# Supplementary material for: The Complete Chloroplast Genomes of Primula obconica Provide Insight That Neither Species nor Natural Section Represent Monophyletic Taxa in Primula (Primulaceae)
Source: MDPI journal article supplement (doi:10.3390/genes13040567), 2022-03-23
Supplement: s1 [file s1]

**Table S6.** SNP annotation based on 16 chloroplast genomes of *P. obconica* subsp. *obconica* using SnpEff

| Type                       | Count  | Percent | Ts/Tv (transitions /<br>transversions) |
|----------------------------|--------|---------|----------------------------------------|
| Total SNPs                 | 1,915  |         |                                        |
| Total possible effects     | 21,371 |         |                                        |
| Downstream gene<br>variant | 9,737  | 45.549% |                                        |
| Intergenic region          | 757    | 3.541%  |                                        |
| Intron variant             | 1,192  | 5.576%  |                                        |
| Missense variant           | 360    | 1.684%  |                                        |
| Splice region variant      | 6      | 0.028%  | 1.1667                                 |
| Stop gained                | 2      | 0.009%  |                                        |
| Stop lost                  | 2      | 0.009%  |                                        |
| Stop retained<br>variant   | 1      | 0.005%  |                                        |
| Synonymous variant         | 361    | 1.689%  |                                        |
| Upstream gene<br>variant   | 8,959  | 41.91%  |                                        |
