# Supplementary material for: The Complete Chloroplast Genomes of Primula obconica Provide Insight That Neither Species nor Natural Section Represent Monophyletic Taxa in Primula (Primulaceae)
Source: MDPI journal article supplement (doi:10.3390/genes13040567), 2022-03-23
Supplement: s1 [file s1]

**Table S4.** The lengths of introns and exons for the splitting genes in *P. obconica* subsp. *obconica*

| Species | Gene         | Start  | End    | Exon I<br>(bp) | Intron I<br>(bp) | Exon II<br>(bp) | Intron<br>II (bp) | Exon<br>III (bp) |
|---------|--------------|--------|--------|----------------|------------------|-----------------|-------------------|------------------|
| HBD     | trnK-<br>UUU | 1766   | 4323   | 37             | 2486             | 35              |                   |                  |
|         | rps16        | 5000   | 6112   | 40             | 840              | 233             |                   |                  |
|         | trnG-<br>UCC | 8990   | 9749   | 23             | 689              | 48              |                   |                  |
|         | atpF         | 11788  | 13064  | 145            | 722              | 410             |                   |                  |
|         | rpoC1        | 20547  | 23354  | 432            | 759              | 1617            |                   |                  |
|         | ycf3         | 42142  | 44077  | 126            | 715              | 228             | 714               | 153              |
|         | trnL-<br>UAA | 47078  | 47677  | 35             | 515              | 50              |                   |                  |
|         | trnV-<br>UAC | 51593  | 52269  | 39             | 603              | 35              |                   |                  |
|         | clpP         | 70300  | 72379  | 71             | 849              | 294             | 640               | 226              |
|         | petB         | 75326  | 76740  | 6              | 767              | 642             |                   |                  |
|         | petD         | 76934  | 78155  | 8              | 739              | 475             |                   |                  |
|         | rpl16        | 81616  | 83023  | 9              | 1000             | 399             |                   |                  |
|         | rpl2         | 84661  | 86149  | 394            | 661              | 434             |                   |                  |
|         | ndhB         | 94960  | 97171  | 775            | 679              | 758             |                   |                  |
|         | trnI-<br>GAU | 102755 | 103585 | 37             | 759              | 35              |                   |                  |
|         | trnA-<br>UGC | 103649 | 104531 | 38             | 810              | 35              |                   |                  |
|         | ndhF         | 109608 | 112577 | 1781           | 1188             | 1               |                   |                  |
|         | ndhA         | 119424 | 121530 | 469            | 1099             | 539             |                   |                  |
|         | trnA-<br>UGC | 133930 | 134812 | 38             | 810              | 35              |                   |                  |
|         | trnI-<br>GAU | 134876 | 135706 | 37             | 759              | 35              |                   |                  |
|         | ndhB         | 141290 | 143501 | 775            | 679              | 758             |                   |                  |
|         | rpl2         | 152312 | 153800 | 394            | 661              | 434             |                   |                  |
| HBE     | trnK-<br>UUU | 1766   | 4324   | 37             | 2487             | 35              |                   |                  |
|         | rps16        | 5001   | 6100   | 40             | 827              | 233             |                   |                  |
|         | trnG-<br>UCC | 8978   | 9737   | 23             | 689              | 48              |                   |                  |
|         | atpF         | 11777  | 13064  | 145            | 733              | 410             |                   |                  |
|         | rpoC1        | 20547  | 23352  | 432            | 757              | 1617            |                   |                  |
|         | ycf3         | 42149  | 44088  | 126            | 713              | 228             | 720               | 153              |
|         | trnL-<br>UAA | 47076  | 47674  | 35             | 514              | 50              |                   |                  |
|         | trnV-        | 51602  | 52278  | 39             | 603              | 35              |                   |                  |

|     |              |        |        |      |      |      |     |
|-----|--------------|--------|--------|------|------|------|-----|
|     | UAC          |        |        |      |      |      |     |
|     | clpP         | 70220  | 72300  | 71   | 850  | 294  | 640 |
|     | petB         | 75247  | 76662  | 6    | 768  | 642  | 226 |
|     | petD         | 76856  | 78095  | 8    | 757  | 475  |     |
|     | rpl16        | 81558  | 82961  | 9    | 996  | 399  |     |
|     | rpl2         | 84599  | 86087  | 394  | 661  | 434  |     |
|     | ndhB         | 94919  | 97130  | 775  | 679  | 758  |     |
|     | trnI-<br>GAU | 102714 | 103544 | 37   | 759  | 35   |     |
|     | trnA-<br>UGC | 103608 | 104490 | 38   | 810  | 35   |     |
|     | ndhF         | 109567 | 112536 | 1781 | 1188 | 1    |     |
|     | ndhA         | 119464 | 121530 | 469  | 1059 | 539  |     |
|     | trnA-<br>UGC | 133931 | 134813 | 38   | 810  | 35   |     |
|     | trnI-<br>GAU | 134877 | 135707 | 37   | 759  | 35   |     |
|     | ndhB         | 141291 | 143502 | 775  | 679  | 758  |     |
|     | rpl2         | 152334 | 153822 | 394  | 661  | 434  |     |
| HND | trnK-<br>UUU | 1766   | 4325   | 37   | 2488 | 35   |     |
|     | rps16        | 5002   | 6111   | 40   | 837  | 233  |     |
|     | trnG-<br>UCC | 8990   | 9749   | 23   | 689  | 48   |     |
|     | atpF         | 11787  | 13074  | 145  | 733  | 410  |     |
|     | rpoC1        | 20560  | 23376  | 432  | 768  | 1617 |     |
|     | ycf3         | 42195  | 44135  | 126  | 714  | 228  | 720 |
|     | trnL-<br>UAA | 47166  | 47764  | 35   | 514  | 50   | 153 |
|     | trnV-<br>UAC | 51679  | 52355  | 39   | 603  | 35   |     |
|     | clpP         | 70358  | 72436  | 71   | 848  | 294  | 640 |
|     | petB         | 75383  | 76798  | 6    | 768  | 642  | 226 |
|     | petD         | 76992  | 78268  | 8    | 794  | 475  |     |
|     | rpl16        | 81729  | 83137  | 9    | 1001 | 399  |     |
|     | rpl2         | 84763  | 86251  | 394  | 661  | 434  |     |
|     | ndhB         | 95062  | 97273  | 775  | 679  | 758  |     |
|     | trnI-<br>GAU | 102857 | 103687 | 37   | 759  | 35   |     |
|     | trnA-<br>UGC | 103751 | 104632 | 38   | 809  | 35   |     |
|     | ndhF         | 109709 | 112678 | 1781 | 1188 | 1    |     |
|     | ndhA         | 119591 | 121697 | 469  | 1099 | 539  |     |
|     | trnA-        | 134098 | 134979 | 38   | 809  | 35   |     |

|     |       |        |        |      |      |      |     |     |
|-----|-------|--------|--------|------|------|------|-----|-----|
|     | UGC   |        |        |      |      |      |     |     |
|     | trnI- | 135043 | 135873 | 37   | 759  | 35   |     |     |
|     | GAU   |        |        |      |      |      |     |     |
|     | ndhB  | 141457 | 143668 | 775  | 679  | 758  |     |     |
|     | rpl2  | 152479 | 153967 | 394  | 661  | 434  |     |     |
| HNL | trnK- | 1766   | 4325   | 37   | 2488 | 35   |     |     |
|     | UUU   |        |        |      |      |      |     |     |
|     | rps16 | 5002   | 6111   | 40   | 837  | 233  |     |     |
|     | trnG- | 8990   | 9749   | 23   | 689  | 48   |     |     |
|     | UCC   |        |        |      |      |      |     |     |
|     | atpF  | 11787  | 13074  | 145  | 733  | 410  |     |     |
|     | rpoC1 | 20560  | 23376  | 432  | 768  | 1617 |     |     |
|     | ycf3  | 42195  | 44135  | 126  | 714  | 228  | 720 | 153 |
|     | trnL- | 47166  | 47764  | 35   | 514  | 50   |     |     |
|     | UAA   |        |        |      |      |      |     |     |
|     | trnV- | 51679  | 52355  | 39   | 603  | 35   |     |     |
|     | UAC   |        |        |      |      |      |     |     |
|     | clpP  | 70358  | 72436  | 71   | 848  | 294  | 640 | 226 |
|     | petB  | 75383  | 76798  | 6    | 768  | 642  |     |     |
|     | petD  | 76992  | 78268  | 8    | 794  | 475  |     |     |
|     | rpl16 | 81729  | 83137  | 9    | 1001 | 399  |     |     |
|     | rpl2  | 84763  | 86251  | 394  | 661  | 434  |     |     |
|     | ndhB  | 95062  | 97273  | 775  | 679  | 758  |     |     |
|     | trnI- | 102857 | 103687 | 37   | 759  | 35   |     |     |
|     | GAU   |        |        |      |      |      |     |     |
|     | trnA- | 103751 | 104632 | 38   | 809  | 35   |     |     |
|     | UGC   |        |        |      |      |      |     |     |
|     | ndhF  | 109709 | 112678 | 1781 | 1188 | 1    |     |     |
|     | ndhA  | 119591 | 121697 | 469  | 1099 | 539  |     |     |
|     | trnA- | 134098 | 134979 | 38   | 809  | 35   |     |     |
|     | UGC   |        |        |      |      |      |     |     |
|     | trnI- | 135043 | 135873 | 37   | 759  | 35   |     |     |
|     | GAU   |        |        |      |      |      |     |     |
|     | ndhB  | 141457 | 143668 | 775  | 679  | 758  |     |     |
|     | rpl2  | 152479 | 153967 | 394  | 661  | 434  |     |     |
| ZP1 | trnK- | 1766   | 4326   | 37   | 2489 | 35   |     |     |
|     | UUU   |        |        |      |      |      |     |     |
|     | rps16 | 5003   | 6112   | 40   | 837  | 233  |     |     |
|     | trnG- | 8992   | 9751   | 23   | 689  | 48   |     |     |
|     | UCC   |        |        |      |      |      |     |     |
|     | atpF  | 11790  | 13077  | 145  | 733  | 410  |     |     |
|     | rpoC1 | 20560  | 23366  | 432  | 758  | 1617 |     |     |
|     | ycf3  | 42183  | 44117  | 126  | 714  | 228  | 714 | 153 |
|     | trnL- | 47147  | 47747  | 35   | 516  | 50   |     |     |

|     |       |        |        |      |      |      |         |
|-----|-------|--------|--------|------|------|------|---------|
|     | UAA   |        |        |      |      |      |         |
|     | trnV- | 51599  | 52275  | 39   | 603  | 35   |         |
|     | UAC   |        |        |      |      |      |         |
|     | clpP  | 70288  | 72367  | 71   | 850  | 294  | 639 226 |
|     | petB  | 75314  | 76728  | 6    | 767  | 642  |         |
|     | petD  | 76922  | 78143  | 8    | 739  | 475  |         |
|     | rpl16 | 81605  | 83011  | 9    | 999  | 399  |         |
|     | rpl2  | 84649  | 86137  | 394  | 661  | 434  |         |
|     | ndhB  | 94948  | 97159  | 775  | 679  | 758  |         |
|     | trnI- | 102744 | 103574 | 37   | 759  | 35   |         |
|     | GAU   |        |        |      |      |      |         |
|     | trnA- | 103638 | 104522 | 38   | 812  | 35   |         |
|     | UGC   |        |        |      |      |      |         |
|     | ndhF  | 109599 | 112568 | 1781 | 1188 | 1    |         |
|     | ndhA  | 119396 | 121502 | 469  | 1099 | 539  |         |
|     | trnA- | 133903 | 134787 | 38   | 812  | 35   |         |
|     | UGC   |        |        |      |      |      |         |
|     | trnI- | 134851 | 135681 | 37   | 759  | 35   |         |
|     | GAU   |        |        |      |      |      |         |
|     | ndhB  | 141266 | 143477 | 775  | 679  | 758  |         |
|     | rpl2  | 152288 | 153776 | 394  | 661  | 434  |         |
| ZP2 | trnK- | 1766   | 4324   | 37   | 2487 | 35   |         |
|     | UUU   |        |        |      |      |      |         |
|     | rps16 | 5001   | 6113   | 40   | 840  | 233  |         |
|     | trnG- | 8993   | 9752   | 23   | 689  | 48   |         |
|     | UCC   |        |        |      |      |      |         |
|     | atpF  | 11792  | 13068  | 145  | 722  | 410  |         |
|     | rpoC1 | 20563  | 23369  | 432  | 758  | 1617 |         |
|     | ycf3  | 42150  | 44084  | 126  | 714  | 228  | 714 153 |
|     | trnL- | 47116  | 47714  | 35   | 514  | 50   |         |
|     | UAA   |        |        |      |      |      |         |
|     | trnV- | 51628  | 52304  | 39   | 603  | 35   |         |
|     | UAC   |        |        |      |      |      |         |
|     | clpP  | 70328  | 72407  | 71   | 850  | 294  | 639 226 |
|     | petB  | 75354  | 76769  | 6    | 768  | 642  |         |
|     | petD  | 76963  | 78184  | 8    | 739  | 475  |         |
|     | rpl16 | 81645  | 83052  | 9    | 1000 | 399  |         |
|     | rpl2  | 84690  | 86178  | 394  | 661  | 434  |         |
|     | ndhB  | 94989  | 97200  | 775  | 679  | 758  |         |
|     | trnI- | 102784 | 103615 | 37   | 760  | 35   |         |
|     | GAU   |        |        |      |      |      |         |
|     | trnA- | 103679 | 104560 | 38   | 809  | 35   |         |
|     | UGC   |        |        |      |      |      |         |
|     | ndhF  | 109637 | 112606 | 1781 | 1188 | 1    |         |

|     |          |        |        |      |      |      |     |     |
|-----|----------|--------|--------|------|------|------|-----|-----|
|     | ndhA     | 119516 | 121622 | 469  | 1099 | 539  |     |     |
|     | trnA-UGC | 134023 | 134904 | 38   | 809  | 35   |     |     |
|     | trnI-GAU | 134968 | 135799 | 37   | 760  | 35   |     |     |
|     | ndhB     | 141383 | 143594 | 775  | 679  | 758  |     |     |
|     | rpl2     | 152405 | 153893 | 394  | 661  | 434  |     |     |
| SCB | trnK-UUU | 1782   | 4342   | 37   | 2489 | 35   |     |     |
|     | rps16    | 4997   | 6085   | 40   | 816  | 233  |     |     |
|     | trnG-UCC | 8955   | 9714   | 23   | 689  | 48   |     |     |
|     | atpF     | 11753  | 13034  | 145  | 727  | 410  |     |     |
|     | rpoC1    | 20642  | 23435  | 432  | 745  | 1617 |     |     |
|     | ycf3     | 42435  | 44370  | 124  | 713  | 230  | 716 | 153 |
|     | trnL-UAA | 47416  | 48013  | 35   | 513  | 50   |     |     |
|     | trnV-UAC | 51924  | 52593  | 39   | 596  | 35   |     |     |
|     | clpP     | 70486  | 72576  | 71   | 854  | 294  | 646 | 226 |
|     | petB     | 75523  | 76937  | 6    | 767  | 642  |     |     |
|     | petD     | 77131  | 78399  | 8    | 786  | 475  |     |     |
|     | rpl16    | 81868  | 83116  | 9    | 841  | 399  |     |     |
|     | rpl2     | 84754  | 86242  | 394  | 661  | 434  |     |     |
|     | ndhB     | 95053  | 97264  | 775  | 679  | 758  |     |     |
|     | trnI-GAU | 102854 | 103684 | 37   | 759  | 35   |     |     |
|     | trnA-UGC | 103748 | 104629 | 38   | 809  | 35   |     |     |
|     | ndhF     | 109661 | 112635 | 1781 | 1193 | 1    |     |     |
|     | ndhA     | 119212 | 121313 | 469  | 1094 | 539  |     |     |
|     | trnA-UGC | 133648 | 134529 | 38   | 809  | 35   |     |     |
|     | trnI-GAU | 134593 | 135423 | 37   | 759  | 35   |     |     |
|     | ndhB     | 141013 | 143224 | 775  | 679  | 758  |     |     |
|     | rpl2     | 152035 | 153523 | 394  | 661  | 434  |     |     |
| SCD | trnK-UUU | 1766   | 4326   | 37   | 2489 | 35   |     |     |
|     | rps16    | 4888   | 5998   | 40   | 838  | 233  |     |     |
|     | trnG-UCC | 8861   | 9620   | 23   | 689  | 48   |     |     |
|     | atpF     | 11661  | 12934  | 145  | 719  | 410  |     |     |
|     | rpoC1    | 20543  | 23336  | 432  | 745  | 1617 |     |     |

|    |              |        |        |      |      |      |     |     |
|----|--------------|--------|--------|------|------|------|-----|-----|
|    | ycf3         | 42331  | 44272  | 124  | 715  | 230  | 720 | 153 |
|    | trnL-<br>UAA | 47305  | 47901  | 35   | 512  | 50   |     |     |
|    | trnV-<br>UAC | 51806  | 52475  | 39   | 596  | 35   |     |     |
|    | clpP         | 70329  | 72419  | 71   | 854  | 294  | 646 | 226 |
|    | petB         | 75366  | 76780  | 6    | 767  | 642  |     |     |
|    | petD         | 76974  | 78254  | 8    | 798  | 475  |     |     |
|    | rpl16        | 81724  | 83136  | 9    | 1005 | 399  |     |     |
|    | rpl2         | 84774  | 86262  | 394  | 661  | 434  |     |     |
|    | ndhB         | 95073  | 97284  | 775  | 679  | 758  |     |     |
|    | trnI-<br>GAU | 102874 | 103704 | 37   | 759  | 35   |     |     |
|    | trnA-<br>UGC | 103768 | 104649 | 38   | 809  | 35   |     |     |
|    | ndhF         | 109681 | 112655 | 1781 | 1193 | 1    |     |     |
|    | ndhA         | 119225 | 121326 | 469  | 1094 | 539  |     |     |
|    | trnA-<br>UGC | 133655 | 134536 | 38   | 809  | 35   |     |     |
|    | trnI-<br>GAU | 134600 | 135430 | 37   | 759  | 35   |     |     |
|    | ndhB         | 141020 | 143231 | 775  | 679  | 758  |     |     |
|    | rpl2         | 152042 | 153530 | 394  | 661  | 434  |     |     |
| YN | trnK-<br>UUU | 1767   | 4325   | 37   | 2487 | 35   |     |     |
|    | rps16        | 4996   | 6105   | 40   | 837  | 233  |     |     |
|    | trnG-<br>UCC | 8978   | 9737   | 23   | 689  | 48   |     |     |
|    | atpF         | 11789  | 13051  | 145  | 720  | 398  |     |     |
|    | rpoC1        | 20646  | 23439  | 432  | 745  | 1617 |     |     |
|    | ycf3         | 42085  | 44026  | 124  | 715  | 230  | 720 | 153 |
|    | trnL-<br>UAA | 47056  | 47653  | 35   | 513  | 50   |     |     |
|    | trnV-<br>UAC | 51563  | 52232  | 39   | 596  | 35   |     |     |
|    | clpP         | 70056  | 72139  | 71   | 847  | 294  | 646 | 226 |
|    | petB         | 75079  | 76493  | 6    | 767  | 642  |     |     |
|    | petD         | 76687  | 77949  | 8    | 780  | 475  |     |     |
|    | rpl16        | 81416  | 82827  | 9    | 1004 | 399  |     |     |
|    | rpl2         | 84465  | 85953  | 394  | 661  | 434  |     |     |
|    | ndhB         | 94785  | 96996  | 775  | 679  | 758  |     |     |
|    | trnI-<br>GAU | 102586 | 103416 | 37   | 759  | 35   |     |     |
|    | trnA-        | 103480 | 104361 | 38   | 809  | 35   |     |     |

|       |        |        |      |      |     |
|-------|--------|--------|------|------|-----|
| UGC   |        |        |      |      |     |
| ndhF  | 109388 | 112362 | 1781 | 1193 | 1   |
| ndhA  | 119251 | 121352 | 469  | 1094 | 539 |
| trnA- | 133688 | 134569 | 38   | 809  | 35  |
| UGC   |        |        |      |      |     |
| trnI- | 134633 | 135463 | 37   | 759  | 35  |
| GAU   |        |        |      |      |     |
| ndhB  | 141053 | 143264 | 775  | 679  | 758 |
| rpl2  | 152096 | 153584 | 394  | 661  | 434 |

---
