# Supplementary material for: The Complete Chloroplast Genomes of Primula obconica Provide Insight That Neither Species nor Natural Section Represent Monophyletic Taxa in Primula (Primulaceae)
Source: MDPI journal article supplement (doi:10.3390/genes13040567), 2022-03-23
Supplement: s1 [file s1]

**Table S2.** Comparison of general characteristics of the cp genomes of *P. obconica* subsp. *obconica*.

| Species | Total size(bp) | GC content(%) | LSC size(bp) | SSC size(bp) | IR size(bp) | number<br>of genes | rRNA<br>gene<br>number | tRNA<br>gene<br>number |
|---------|----------------|---------------|--------------|--------------|-------------|--------------------|------------------------|------------------------|
| HBD1    | 153861         | 37.2          | 84599        | 17676        | 25793       | 128                | 37                     | 8                      |
| HBD2    | 153861         | 37.2          | 84599        | 17676        | 25793       | 128                | 37                     | 8                      |
| HNL2    | 154028         | 37.1          | 84701        | 17743        | 25792       | 128                | 37                     | 8                      |
| HNL2    | 154028         | 37.1          | 84701        | 17743        | 25792       | 128                | 37                     | 8                      |
| HND1    | 154028         | 37.1          | 84701        | 17743        | 25792       | 128                | 37                     | 8                      |
| HND2    | 154028         | 37.1          | 84701        | 17743        | 25792       | 128                | 37                     | 8                      |
| YN1     | 153645         | 37.3          | 84403        | 17690        | 25776       | 128                | 37                     | 8                      |
| YN2     | 153604         | 37.3          | 84404        | 17690        | 25755       | 128                | 37                     | 8                      |
| HBE1    | 153883         | 37.2          | 84537        | 17718        | 25814       | 128                | 37                     | 8                      |
| HBE2    | 153883         | 37.2          | 84537        | 17718        | 25814       | 128                | 37                     | 8                      |
| ZP2     | 153954         | 37.2          | 84628        | 17740        | 25793       | 128                | 37                     | 8                      |
| ZP1     | 153837         | 37.2          | 84587        | 17658        | 25796       | 128                | 37                     | 8                      |
| SCD1    | 153591         | 37.3          | 84712        | 17347        | 25766       | 128                | 37                     | 8                      |
| SCD2    | 153591         | 37.3          | 84712        | 17347        | 25766       | 128                | 37                     | 8                      |
| SCB1    | 153584         | 37.3          | 84692        | 17360        | 25766       | 128                | 37                     | 8                      |
| SCB2    | 153584         | 37.3          | 84692        | 17360        | 25766       | 128                | 37                     | 8                      |
