# Supplementary material for: The Complete Chloroplast Genomes of Primula obconica Provide Insight That Neither Species nor Natural Section Represent Monophyletic Taxa in Primula (Primulaceae)
Source: MDPI journal article supplement (doi:10.3390/genes13040567), 2022-03-23
Supplement: s1 [file s1]

**Table S1.** Details of accession used in the study.

| Genbank<br>accession<br>numbers | Accession Id | Origin         | Coordinates        |
|---------------------------------|--------------|----------------|--------------------|
| OK040681                        | HBD1         | Hubei, China   | 30.9672N 110.6137E |
| OK040682                        | HBD2         | Hubei, China   | 30.9672N 110.6137E |
| OK040683                        | HBE1         | Hubei, China   | 29.829N 109.5805E  |
| OK040684                        | HBE2         | Hubei, China   | 29.829N 109.5805E  |
| OK040687                        | HNL1         | Hunan, China   | 28.3704N 109.2923E |
| OK040688                        | HNL2         | Hunan, China   | 28.3704N 109.2923E |
| OK040685                        | HND1         | Hunan, China   | 28.3425N 109.2803E |
| OK040686                        | HND2         | Hunan, China   | 28.3425N 109.2803E |
| OK040690                        | ZP1          | Anhui, China,  | cultivated         |
| OK040689                        | ZP2          | Anhui, China,  | cultivated         |
| OK040691                        | SCB1         | Sichuan, China | 30.4205N 102.6529E |
| OK040692                        | SCB2         | Sichuan, China | 30.4205N 102.6529E |
| OK040693                        | SCD1         | Sichuan, China | 31.0819N 103.5757E |
| OK040694                        | SCD2         | Sichuan, China | 31.0819N 103.5757E |
| OK040695                        | YN1          | Yunnan, China  | 27.3893N 104.8214E |
| OK040696                        | YN2          | Yunnan, China  | 27.3893N 104.8214E |

IBSC, South China Botanical Garden
