# Supplementary material for: The Complete Chloroplast Genomes of Primula obconica Provide Insight That Neither Species nor Natural Section Represent Monophyletic Taxa in Primula (Primulaceae)
Source: MDPI journal article supplement (doi:10.3390/genes13040567), 2022-03-23
Supplement: s1 [file s1]

**Table S5:** SNPs identified in *P. obconica* subsp. *obconica* chloroplast genomes

| SNP position | Ref | Alt | Location  |
|--------------|-----|-----|-----------|
| 135          | A   | C   | psbA      |
| 200          | T   | G   | psbA      |
| 225          | G   | A   | psbA      |
| 311          | G   | A   | psbA      |
| 342          | C   | T   | psbA      |
| 372          | A   | C   | psbA      |
| 375          | C   | A   | psbA      |
| 409          | T   | G   | psbA      |
| 426          | T   | C   | psbA      |
| 865          | A   | G   | CDS       |
| 889          | G   | A   | CDS       |
| 1021         | G   | A   | psbA      |
| 1153         | A   | G   | psaA      |
| 1504         | A   | G   | psaA      |
| 1537         | A   | G   | psbA      |
| 1636         | C   | G   | psbA-matK |
| 1666         | T   | G   | psbA-matK |
| 1708         | A   | T   | psbA-matK |
| 1714         | A   | C   | psbA-matK |
| 1748         | C   | A   | psbA-matK |
| 1762         | T   | G   | psbA-matK |
| 1865         | A   | G   | psbA-matK |
| 1888         | T   | G   | psbA-matK |
| 1907         | C   | T   | psbA-matK |
| 1933         | G   | T   | psbA-matK |
| 1934         | A   | C   | psbA-matK |
| 1940         | T   | G   | psbA-matK |
| 1945         | T   | G   | psbA-matK |
| 1946         | C   | A   | psbA-matK |
| 1966         | A   | C   | psbA-matK |
| 1980         | G   | A   | psbA-matK |
| 1982         | A   | C   | psbA-matK |
| 2040         | A   | G   | psbA-matK |
| 2161         | C   | A   | matK      |
| 2199         | A   | G   | matK      |
| 2203         | A   | T   | matK      |
| 2226         | T   | C   | matK      |
| 2269         | C   | T   | matK      |
| 2310         | A   | G   | matK      |
| 2368         | T   | C   | matK      |
| 2382         | C   | A   | matK      |

|      |   |   |            |
|------|---|---|------------|
| 2394 | T | C | matK       |
| 2440 | A | G | matK       |
| 2445 | T | C | matK       |
| 2466 | T | C | matK       |
| 2536 | C | A | matK       |
| 2791 | G | A | matK       |
| 2832 | T | G | matK       |
| 3033 | T | G | matK       |
| 3045 | C | T | matK       |
| 3056 | C | A | matK       |
| 3073 | C | T | matK       |
| 3143 | G | A | matK       |
| 3217 | T | C | matK       |
| 3222 | T | G | matK       |
| 3284 | T | G | matK       |
| 3297 | C | T | matK       |
| 3366 | T | C | matK       |
| 3460 | C | T | matK       |
| 3462 | C | G | matK       |
| 3515 | G | T | matK       |
| 3519 | C | T | matK       |
| 3546 | G | T | matK       |
| 3586 | T | C | matK       |
| 3601 | T | G | matK-rps16 |
| 3633 | G | A | matK-rps16 |
| 3661 | C | A | matK-rps16 |
| 3702 | G | A | matK-rps16 |
| 3748 | T | A | matK-rps16 |
| 3749 | A | C | matK-rps16 |
| 3793 | C | A | matK-rps16 |
| 3821 | G | A | matK-rps16 |
| 3864 | T | C | matK-rps16 |
| 3917 | C | A | matK-rps16 |
| 3958 | T | C | matK-rps16 |
| 4021 | C | T | matK-rps16 |
| 4040 | C | T | matK-rps16 |
| 4108 | G | A | matK-rps16 |
| 4111 | C | T | matK-rps16 |
| 4127 | A | C | matK-rps16 |
| 4289 | G | A | matK-rps16 |
| 4290 | C | T | matK-rps16 |
| 4408 | G | A | matK-rps16 |
| 4455 | A | C | matK-rps16 |
| 4460 | A | C | matK-rps16 |

|      |   |   |            |
|------|---|---|------------|
| 4462 | T | C | matK-rps16 |
| 4483 | T | C | matK-rps16 |
| 4510 | A | C | matK-rps16 |
| 4586 | A | T | matK-rps16 |
| 4597 | G | A | matK-rps16 |
| 4614 | A | G | matK-rps16 |
| 4614 | A | T | matK-rps16 |
| 4620 | A | C | matK-rps16 |
| 4699 | T | G | matK-rps16 |
| 4703 | T | G | matK-rps16 |
| 4706 | A | G | matK-rps16 |
| 4708 | C | A | matK-rps16 |
| 4749 | G | A | matK-rps16 |
| 4788 | G | T | matK-rps16 |
| 4843 | C | T | matK-rps16 |
| 4872 | T | G | matK-rps16 |
| 4881 | G | A | matK-rps16 |
| 4893 | G | A | matK-rps16 |
| 4906 | T | G | matK-rps16 |
| 4913 | T | C | matK-rps16 |
| 4946 | C | A | matK-rps16 |
| 4956 | T | C | matK-rps16 |
| 4957 | T | G | matK-rps16 |
| 4978 | T | G | matK-rps16 |
| 4992 | G | T | rps16      |
| 5060 | C | G | rps16      |
| 5127 | A | C | rps16      |
| 5240 | G | T | rps16      |
| 5311 | G | T | rps16      |
| 5316 | G | T | rps16      |
| 5366 | G | T | rps16      |
| 5389 | T | C | rps16      |
| 5398 | A | T | rps16      |
| 5491 | G | T | rps16      |
| 5495 | C | T | rps16      |
| 5523 | T | C | rps16      |
| 5650 | C | G | rps16      |
| 5748 | G | T | rps16      |
| 5763 | C | T | rps16      |
| 5869 | C | T | rps16      |
| 5989 | C | T | rps16      |
| 6180 | T | G | rps16-psbK |
| 6184 | C | G | rps16-psbK |
| 6208 | A | C | rps16-psbK |

|      |   |   |            |
|------|---|---|------------|
| 6244 | T | C | rps16-psbK |
| 6278 | G | A | rps16-psbK |
| 6288 | A | C | rps16-psbK |
| 6330 | A | G | rps16-psbK |
| 6345 | T | G | rps16-psbK |
| 6442 | A | G | rps16-psbK |
| 6479 | T | G | rps16-psbK |
| 6527 | C | T | rps16-psbK |
| 6554 | G | A | rps16-psbK |
| 6611 | A | G | rps16-psbK |
| 6629 | G | A | rps16-psbK |
| 6650 | G | A | rps16-psbK |
| 6731 | C | T | rps16-psbK |
| 6740 | C | T | rps16-psbK |
| 6780 | T | G | rps16-psbK |
| 6790 | T | C | rps16-psbK |
| 6800 | A | C | rps16-psbK |
| 6806 | A | C | rps16-psbK |
| 6813 | A | C | rps16-psbK |
| 6825 | C | A | rps16-psbK |
| 6826 | G | A | rps16-psbK |
| 6844 | A | C | rps16-psbK |
| 6925 | T | A | rps16-psbK |
| 6967 | T | C | rps16-psbK |
| 6972 | G | A | rps16-psbK |
| 6983 | T | G | rps16-psbK |
| 6998 | T | G | rps16-psbK |
| 7093 | C | T | rps16-psbK |
| 7117 | A | G | rps16-psbK |
| 7161 | T | G | rps16-psbK |
| 7172 | T | G | rps16-psbK |
| 7206 | C | A | rps16-psbK |
| 7226 | A | C | rps16-psbK |
| 7233 | A | C | rps16-psbK |
| 7281 | T | C | rps16-psbK |
| 7347 | C | A | rps16-psbK |
| 7348 | C | A | rps16-psbK |
| 7353 | T | G | rps16-psbK |
| 7445 | T | C | psbK       |
| 7485 | A | C | psbK       |
| 7496 | C | T | psbK       |
| 7511 | G | A | psbK       |
| 7732 | A | C | psbK-psbI  |
| 7741 | A | C | psbK-psbI  |

|      |   |   |           |
|------|---|---|-----------|
| 7748 | G | T | psbK-psbI |
| 7817 | A | C | psbK-psbI |
| 7835 | C | A | psbK-psbI |
| 7843 | G | A | psbK-psbI |
| 7883 | C | T | psbK-psbI |
| 7900 | C | T | psbK-psbI |
| 7937 | G | A | psbK-psbI |
| 7952 | G | A | psbK-psbI |
| 7966 | G | A | psbK-psbI |
| 7994 | G | T | psbK-psbI |
| 7995 | G | T | psbK-psbI |
| 8165 | A | C | psbI-atpA |
| 8180 | T | C | psbI-atpA |
| 8355 | T | G | psbI-atpA |
| 8391 | A | C | psbI-atpA |
| 8469 | G | C | psbI-atpA |
| 8523 | G | A | psbI-atpA |
| 8542 | A | C | psbI-atpA |
| 8572 | G | T | psbI-atpA |
| 8622 | A | C | psbI-atpA |
| 8622 | A | T | psbI-atpA |
| 8649 | G | T | psbI-atpA |
| 8656 | A | C | psbI-atpA |
| 8669 | A | C | psbI-atpA |
| 8670 | T | G | psbI-atpA |
| 8697 | T | G | psbI-atpA |
| 8771 | T | C | psbI-atpA |
| 8772 | A | G | psbI-atpA |
| 8772 | A | C | psbI-atpA |
| 8773 | A | G | psbI-atpA |
| 8808 | A | C | psbI-atpA |
| 8851 | G | T | psbI-atpA |
| 8862 | C | T | psbI-atpA |
| 8879 | C | T | psbI-atpA |
| 8885 | G | A | psbI-atpA |
| 8886 | G | T | psbI-atpA |
| 9022 | T | C | psbI-atpA |
| 9070 | T | A | psbI-atpA |
| 9126 | T | G | psbI-atpA |
| 9134 | G | A | psbI-atpA |
| 9192 | A | C | psbI-atpA |
| 9275 | A | G | psbI-atpA |
| 9275 | A | T | psbI-atpA |
| 9289 | G | A | psbI-atpA |

|       |   |   |           |
|-------|---|---|-----------|
| 9326  | A | C | psbI-atpA |
| 9342  | G | A | psbI-atpA |
| 9347  | A | G | psbI-atpA |
| 9366  | A | G | psbI-atpA |
| 9405  | A | T | psbI-atpA |
| 9503  | A | C | psbI-atpA |
| 9532  | G | T | psbI-atpA |
| 9569  | C | A | psbI-atpA |
| 9628  | A | C | psbI-atpA |
| 9640  | T | C | psbI-atpA |
| 9648  | G | T | psbI-atpA |
| 9726  | T | C | psbI-atpA |
| 9776  | C | T | psbI-atpA |
| 9801  | A | G | psbI-atpA |
| 9857  | T | C | psbI-atpA |
| 9894  | G | T | psbI-atpA |
| 9899  | A | C | psbI-atpA |
| 9971  | T | C | psbI-atpA |
| 9985  | C | A | psbI-atpA |
| 10066 | G | A | psbI-atpA |
| 10143 | T | C | psbI-atpA |
| 10286 | G | A | atpA      |
| 10292 | A | C | atpA      |
| 10298 | A | C | atpA      |
| 10478 | C | T | atpA      |
| 10511 | T | G | atpA      |
| 10538 | C | T | atpA      |
| 10657 | G | A | atpA      |
| 11282 | T | C | atpA      |
| 11334 | G | A | atpA      |
| 11341 | T | G | atpA      |
| 11423 | G | A | atpA      |
| 11615 | T | A | atpA      |
| 11648 | C | T | atpA      |
| 11718 | G | C | atpA-atpF |
| 11769 | C | A | atpF      |
| 11840 | T | G | atpF      |
| 11888 | C | T | atpF      |
| 11892 | C | T | atpF      |
| 11987 | A | C | atpF      |
| 11996 | C | T | atpF      |
| 12043 | G | T | atpF      |
| 12089 | G | A | atpF      |
| 12097 | G | A | atpF      |

|       |   |   |           |
|-------|---|---|-----------|
| 12194 | C | T | atpF      |
| 12475 | C | A | atpF      |
| 12526 | T | C | atpF      |
| 12587 | A | C | atpF      |
| 12588 | G | A | atpF      |
| 12613 | G | A | atpF      |
| 12726 | G | A | atpF      |
| 12753 | A | G | atpF      |
| 12767 | T | G | atpF      |
| 12773 | A | C | atpF      |
| 12840 | T | C | atpF      |
| 12844 | A | G | atpF      |
| 12907 | T | G | atpF      |
| 12939 | G | A | atpF      |
| 12980 | A | G | atpF      |
| 13092 | A | C | atpF-atpH |
| 13145 | G | T | atpF-atpH |
| 13149 | T | A | atpF-atpH |
| 13211 | A | G | atpF-atpH |
| 13330 | C | T | atpF-atpH |
| 13388 | A | G | atpF-atpH |
| 13401 | A | C | atpF-atpH |
| 13408 | A | C | atpF-atpH |
| 13567 | A | G | atpH      |
| 13591 | T | C | atpH      |
| 13597 | T | C | atpH      |
| 13751 | T | C | atpH-atpI |
| 13809 | T | C | atpH-atpI |
| 13849 | A | C | atpH-atpI |
| 13930 | A | C | atpH-atpI |
| 13948 | T | C | atpH-atpI |
| 13995 | C | T | atpH-atpI |
| 14044 | T | C | atpH-atpI |
| 14137 | C | T | atpH-atpI |
| 14204 | C | A | atpH-atpI |
| 14207 | T | C | atpH-atpI |
| 14547 | A | G | atpI      |
| 14775 | G | A | atpI      |
| 14892 | A | G | atpI      |
| 14940 | C | T | atpI      |
| 14958 | G | T | atpI      |
| 14985 | C | G | atpI      |
| 15209 | G | T | atpI-rps2 |
| 15214 | A | C | atpI-rps2 |

|       |   |   |            |
|-------|---|---|------------|
| 15222 | T | G | atpI-rps2  |
| 15287 | C | A | atpI-rps2  |
| 15312 | C | T | atpI-rps2  |
| 15330 | C | A | atpI-rps2  |
| 15396 | A | C | rps2       |
| 15588 | T | C | rps2       |
| 15661 | T | C | rps2       |
| 15672 | T | G | rps2       |
| 15703 | A | G | rps2       |
| 15794 | T | C | rps2       |
| 15797 | G | A | rps2       |
| 15967 | C | T | rps2       |
| 16038 | G | T | rps2-rpoC2 |
| 16055 | C | T | rps2-rpoC2 |
| 16103 | A | G | rps2-rpoC2 |
| 16160 | T | G | rps2-rpoC2 |
| 16178 | A | G | rps2-rpoC2 |
| 16209 | G | T | rps2-rpoC2 |
| 16284 | G | T | rps2-rpoC2 |
| 16422 | G | T | rpoC2      |
| 16618 | G | A | rpoC2      |
| 16696 | T | C | rpoC2      |
| 16744 | A | G | rpoC2      |
| 16822 | G | A | rpoC2      |
| 16828 | C | T | rpoC2      |
| 16896 | G | A | rpoC2      |
| 17020 | T | C | rpoC2      |
| 17137 | T | C | rpoC2      |
| 17441 | G | T | rpoC2      |
| 17453 | G | A | rpoC2      |
| 17459 | G | T | rpoC2      |
| 17480 | G | A | rpoC2      |
| 17489 | T | A | rpoC2      |
| 17496 | T | G | rpoC2      |
| 17530 | C | T | rpoC2      |
| 17561 | G | T | rpoC2      |
| 17729 | A | G | rpoC2      |
| 17743 | G | A | rpoC2      |
| 18034 | C | T | rpoC2      |
| 18040 | A | C | rpoC2      |
| 18148 | C | T | rpoC2      |
| 18182 | C | A | rpoC2      |
| 18202 | C | T | rpoC2      |
| 18341 | C | T | rpoC2      |



|       |   |   |             |
|-------|---|---|-------------|
| 18380 | C | A | rpoC2       |
| 18432 | G | A | rpoC2       |
| 18479 | G | A | rpoC2       |
| 18544 | C | T | rpoC2       |
| 18748 | C | T | rpoC2       |
| 18763 | C | G | rpoC2       |
| 18843 | T | C | rpoC2       |
| 18911 | T | G | rpoC2       |
| 18956 | T | G | rpoC2       |
| 19016 | A | G | rpoC2       |
| 19168 | C | A | rpoC2       |
| 19361 | A | C | rpoC2       |
| 19405 | C | A | rpoC2       |
| 19735 | G | T | rpoC2       |
| 19743 | A | T | rpoC2       |
| 19903 | A | G | rpoC2       |
| 20191 | C | T | rpoC2       |
| 20284 | T | G | rpoC2       |
| 20486 | T | C | rpoC2-rpoC1 |
| 20587 | A | C | rpoC2-rpoC1 |
| 20618 | T | C | rpoC2-rpoC1 |
| 21029 | C | T | rpoC1       |
| 21123 | A | C | rpoC1       |
| 21237 | A | G | rpoC1       |
| 21462 | T | C | rpoC1       |
| 21471 | T | C | rpoC1       |
| 21510 | C | A | rpoC1       |
| 21693 | C | T | rpoC1       |
| 21746 | A | C | rpoC1       |
| 21753 | G | A | rpoC1       |
| 21864 | T | G | rpoC1       |
| 21912 | A | C | rpoC1       |
| 21951 | C | T | rpoC1       |
| 22034 | A | T | rpoC1       |
| 22037 | C | T | rpoC1       |
| 22038 | A | C | rpoC1       |
| 22043 | T | G | rpoC1       |
| 22131 | G | T | rpoC1       |
| 22149 | G | A | rpoC1       |
| 22342 | A | G | rpoC1       |
| 22483 | C | T | rpoC1       |
| 22498 | G | T | rpoC1       |
| 22717 | G | T | rpoC1       |
| 22767 | A | G | rpoC1       |

|       |   |   |       |
|-------|---|---|-------|
| 22790 | A | C | rpoC1 |
| 22829 | C | T | rpoC1 |
| 22898 | T | G | rpoC1 |
| 22918 | A | G | rpoC1 |
| 22973 | C | T | rpoC1 |
| 23045 | T | G | rpoC1 |
| 23262 | C | T | rpoC1 |
| 23667 | G | A | rpoB  |
| 23678 | C | G | rpoB  |
| 23826 | C | T | rpoB  |
| 23896 | T | G | rpoB  |
| 24027 | T | C | rpoB  |
| 24189 | C | T | rpoB  |
| 24216 | G | T | rpoB  |
| 24221 | C | T | rpoB  |
| 24375 | A | G | rpoB  |
| 24579 | A | C | rpoB  |
| 24627 | C | T | rpoB  |
| 24738 | A | G | rpoB  |
| 25083 | C | T | rpoB  |
| 25095 | A | G | rpoB  |
| 25142 | C | A | rpoB  |
| 25168 | C | A | rpoB  |
| 25200 | C | T | rpoB  |
| 25207 | A | G | rpoB  |
| 25212 | T | C | rpoB  |
| 25228 | T | G | rpoB  |
| 25281 | C | T | rpoB  |
| 25470 | C | T | rpoB  |
| 25488 | G | A | rpoB  |
| 25632 | T | C | rpoB  |
| 25761 | C | T | rpoB  |
| 25769 | T | G | rpoB  |
| 25841 | C | T | rpoB  |
| 25855 | C | T | rpoB  |
| 25904 | G | A | rpoB  |
| 25949 | G | A | rpoB  |
| 26011 | A | T | rpoB  |
| 26223 | A | G | rpoB  |
| 26400 | T | G | rpoB  |
| 26565 | T | C | rpoB  |
| 26572 | T | G | rpoB  |
| 26613 | A | C | rpoB  |
| 26652 | G | T | rpoB  |

|       |   |   |           |
|-------|---|---|-----------|
| 26755 | G | A | rpoB-petN |
| 26771 | T | G | rpoB-petN |
| 26798 | T | G | rpoB-petN |
| 26839 | A | C | rpoB-petN |
| 26881 | T | G | rpoB-petN |
| 26888 | G | T | rpoB-petN |
| 26965 | G | A | rpoB-petN |
| 27027 | T | C | rpoB-petN |
| 27045 | G | T | rpoB-petN |
| 27050 | C | A | rpoB-petN |
| 27057 | T | G | rpoB-petN |
| 27205 | G | A | rpoB-petN |
| 27308 | T | C | rpoB-petN |
| 27324 | A | C | rpoB-petN |
| 27324 | A | G | rpoB-petN |
| 27359 | G | A | rpoB-petN |
| 27459 | G | A | rpoB-petN |
| 27529 | A | C | rpoB-petN |
| 27538 | G | T | rpoB-petN |
| 27543 | C | A | rpoB-petN |
| 27597 | T | G | rpoB-petN |
| 27605 | A | G | rpoB-petN |
| 27609 | C | T | rpoB-petN |
| 27693 | T | G | rpoB-petN |
| 27758 | T | G | rpoB-petN |
| 27762 | C | T | rpoB-petN |
| 27879 | A | C | rpoB-petN |
| 27902 | A | G | rpoB-petN |
| 27903 | G | A | rpoB-petN |
| 27991 | A | G | rpoB-petN |
| 28009 | A | G | rpoB-petN |
| 28014 | G | T | rpoB-petN |
| 28028 | T | C | rpoB-petN |
| 28091 | G | A | rpoB-petN |
| 28139 | T | G | rpoB-petN |
| 28244 | C | T | rpoB-petN |
| 28354 | G | T | petN-psbM |
| 28370 | A | G | petN-psbM |
| 28414 | C | T | petN-psbM |
| 28425 | A | C | petN-psbM |
| 28492 | G | A | petN-psbM |
| 28509 | A | C | petN-psbM |
| 28520 | T | G | petN-psbM |
| 28557 | C | T | petN-psbM |

|       |   |   |           |
|-------|---|---|-----------|
| 28563 | C | G | petN-psbM |
| 28739 | C | T | petN-psbM |
| 28786 | A | C | petN-psbM |
| 28827 | T | G | petN-psbM |
| 28862 | G | A | petN-psbM |
| 28877 | A | C | petN-psbM |
| 28924 | G | A | petN-psbM |
| 28926 | A | C | petN-psbM |
| 28927 | C | A | petN-psbM |
| 29007 | C | T | petN-psbM |
| 29007 | C | A | petN-psbM |
| 29023 | A | G | petN-psbM |
| 29040 | C | T | petN-psbM |
| 29071 | T | C | petN-psbM |
| 29091 | G | A | petN-psbM |
| 29175 | T | C | petN-psbM |
| 29177 | C | T | petN-psbM |
| 29189 | G | A | petN-psbM |
| 29195 | G | A | petN-psbM |
| 29223 | G | A | petN-psbM |
| 29350 | C | T | psbM      |
| 29375 | T | A | psbM-psbD |
| 29375 | T | C | psbM-psbD |
| 29379 | T | A | psbM-psbD |
| 29637 | C | T | psbM-psbD |
| 29653 | G | A | psbM-psbD |
| 29707 | C | T | psbM-psbD |
| 29749 | G | A | psbM-psbD |
| 29767 | A | G | psbM-psbD |
| 29767 | A | C | psbM-psbD |
| 29839 | T | G | psbM-psbD |
| 29846 | T | C | psbM-psbD |
| 29875 | T | G | psbM-psbD |
| 29881 | T | C | psbM-psbD |
| 29942 | A | G | psbM-psbD |
| 29973 | A | G | psbM-psbD |
| 30025 | A | C | psbM-psbD |
| 30038 | G | T | psbM-psbD |
| 30048 | G | A | psbM-psbD |
| 30088 | G | A | psbM-psbD |
| 30142 | T | G | psbM-psbD |
| 30149 | G | A | psbM-psbD |
| 30162 | T | C | psbM-psbD |
| 30181 | T | G | psbM-psbD |

|       |   |   |           |
|-------|---|---|-----------|
| 30203 | G | T | psbM-psbD |
| 30211 | T | G | psbM-psbD |
| 30245 | A | G | psbM-psbD |
| 30267 | C | T | psbM-psbD |
| 30323 | C | A | psbM-psbD |
| 30350 | T | G | psbM-psbD |
| 30369 | G | A | psbM-psbD |
| 30453 | A | G | psbM-psbD |
| 30585 | A | G | psbM-psbD |
| 30593 | T | G | psbM-psbD |
| 30598 | A | G | psbM-psbD |
| 30654 | C | G | psbM-psbD |
| 30668 | G | T | psbM-psbD |
| 30909 | T | C | psbM-psbD |
| 30982 | A | C | psbM-psbD |
| 31019 | G | C | psbM-psbD |
| 31021 | T | A | psbM-psbD |
| 31030 | C | G | psbM-psbD |
| 31041 | C | T | psbM-psbD |
| 31044 | T | C | psbM-psbD |
| 31051 | G | T | psbM-psbD |
| 31062 | G | T | psbM-psbD |
| 31068 | G | A | psbM-psbD |
| 31089 | T | C | psbM-psbD |
| 31093 | A | T | psbM-psbD |
| 31093 | A | G | psbM-psbD |
| 31096 | A | C | psbM-psbD |
| 31108 | A | G | psbM-psbD |
| 31111 | C | A | psbM-psbD |
| 31116 | C | A | psbM-psbD |
| 31130 | T | A | psbM-psbD |
| 31141 | A | C | psbM-psbD |
| 31149 | T | G | psbM-psbD |
| 31170 | C | T | psbM-psbD |
| 31198 | C | T | psbM-psbD |
| 31208 | G | A | psbM-psbD |
| 31216 | A | T | psbM-psbD |
| 31217 | T | C | psbM-psbD |
| 31220 | C | A | psbM-psbD |
| 31228 | A | T | psbM-psbD |
| 31238 | T | C | psbM-psbD |
| 31251 | G | A | psbM-psbD |
| 31286 | G | T | psbM-psbD |
| 31289 | A | C | psbM-psbD |

|       |   |   |           |
|-------|---|---|-----------|
| 31291 | A | C | psbM-psbD |
| 31303 | T | C | psbM-psbD |
| 31306 | G | A | psbM-psbD |
| 31336 | T | A | psbM-psbD |
| 31401 | T | G | psbM-psbD |
| 31500 | A | G | psbM-psbD |
| 31523 | C | T | psbM-psbD |
| 31562 | A | C | psbM-psbD |
| 31699 | A | C | psbM-psbD |
| 31723 | C | A | psbM-psbD |
| 31729 | A | G | psbM-psbD |
| 31738 | T | C | psbM-psbD |
| 31779 | A | G | psbM-psbD |
| 31825 | G | T | psbM-psbD |
| 31844 | C | T | psbM-psbD |
| 31887 | C | T | psbM-psbD |
| 31902 | T | G | psbM-psbD |
| 31925 | A | G | psbM-psbD |
| 31926 | T | G | psbM-psbD |
| 31982 | C | T | psbM-psbD |
| 32007 | A | G | psbM-psbD |
| 32045 | T | G | psbM-psbD |
| 32163 | A | C | psbM-psbD |
| 32203 | C | T | psbM-psbD |
| 32223 | A | C | psbM-psbD |
| 32247 | A | C | psbM-psbD |
| 32298 | C | A | psbM-psbD |
| 32308 | A | C | psbM-psbD |
| 32373 | G | T | psbM-psbD |
| 32374 | A | C | psbM-psbD |
| 32377 | C | T | psbM-psbD |
| 32430 | G | A | psbM-psbD |
| 32460 | G | A | psbM-psbD |
| 32570 | G | A | psbM-psbD |
| 32591 | G | T | psbM-psbD |
| 32750 | G | A | psbM-psbD |
| 33068 | T | C | psbD      |
| 33104 | C | T | psbD      |
| 33218 | T | C | psbD      |
| 33219 | C | T | psbD      |
| 33917 | T | C | psbD-psbC |
| 33990 | T | C | psbC      |
| 34047 | C | A | psbC      |
| 34137 | T | G | psbC      |

|       |   |   |            |
|-------|---|---|------------|
| 34167 | C | T | psbC       |
| 34239 | T | C | psbC       |
| 34308 | T | C | psbC       |
| 34494 | T | G | psbC       |
| 34567 | A | G | psbC       |
| 34839 | A | G | psbC       |
| 35002 | C | T | psbC       |
| 35016 | C | T | psbC       |
| 35046 | C | T | psbC       |
| 35091 | T | C | psbC       |
| 35148 | C | T | psbC       |
| 35350 | T | G | psbC-psbZ  |
| 35402 | C | T | psbC-psbZ  |
| 35409 | C | T | psbC-psbZ  |
| 35422 | T | G | psbC-psbZ  |
| 35485 | G | A | psbC-psbZ  |
| 35495 | C | T | psbC-psbZ  |
| 35522 | A | C | psbC-psbZ  |
| 35690 | G | A | psbC-psbZ  |
| 35727 | A | C | psbC-psbZ  |
| 35759 | A | G | psbC-psbZ  |
| 35804 | C | T | psbC-psbZ  |
| 35813 | G | T | psbC-psbZ  |
| 35818 | A | C | psbC-psbZ  |
| 35820 | A | T | psbC-psbZ  |
| 35829 | T | C | psbC-psbZ  |
| 35829 | T | G | psbC-psbZ  |
| 35901 | T | C | psbC-psbZ  |
| 35936 | C | T | psbC-psbZ  |
| 35971 | G | A | psbC-psbZ  |
| 36010 | C | T | psbZ       |
| 36049 | C | A | psbZ       |
| 36071 | A | G | psbZ       |
| 36258 | A | C | psbZ-rps14 |
| 36287 | G | A | psbZ-rps14 |
| 36360 | G | A | psbZ-rps14 |
| 36373 | A | C | psbZ-rps14 |
| 36434 | A | C | psbZ-rps14 |
| 36468 | C | T | psbZ-rps14 |
| 36551 | G | A | psbZ-rps14 |
| 36571 | A | C | psbZ-rps14 |
| 36828 | T | C | psbZ-rps14 |
| 36853 | G | A | psbZ-rps14 |
| 36860 | T | C | psbZ-rps14 |

|       |   |   |            |
|-------|---|---|------------|
| 36957 | G | A | rps14      |
| 36959 | T | G | rps14      |
| 37078 | C | T | rps14      |
| 37260 | A | C | rps14-psaB |
| 37263 | T | G | rps14-psaB |
| 37264 | A | C | rps14-psaB |
| 37271 | T | G | rps14-psaB |
| 37758 | A | G | psaB       |
| 37779 | A | G | psaB       |
| 37809 | C | T | psaB       |
| 37947 | C | T | psaB       |
| 38052 | G | A | psaB       |
| 38058 | C | A | psaB       |
| 38551 | C | T | psaB       |
| 38568 | C | G | psaB       |
| 38706 | C | T | psaB       |
| 38760 | G | A | psaB       |
| 39045 | T | C | psaB       |
| 39069 | A | C | psaB       |
| 39083 | A | G | psaB       |
| 39192 | A | G | psaB       |
| 39198 | C | T | psaB       |
| 39201 | G | A | psaB       |
| 39817 | G | A | psaA       |
| 39820 | G | T | psaA       |
| 39898 | A | G | psaA       |
| 40051 | A | C | psaA       |
| 40060 | A | G | psaA       |
| 40134 | G | A | psaA       |
| 40315 | G | A | psaA       |
| 40587 | G | A | psaA       |
| 40663 | T | C | psaA       |
| 41027 | T | A | psaA       |
| 41101 | A | G | psaA       |
| 41222 | G | T | psaA       |
| 41332 | T | C | psaA       |
| 41362 | A | G | psaA       |
| 41407 | C | T | psaA       |
| 41584 | T | C | psaA       |
| 41662 | G | A | psaA       |
| 41670 | C | T | psaA       |
| 41751 | C | T | psaA       |
| 41763 | A | G | psaA       |
| 41837 | G | T | psaA-ycf3  |



|       |   |   |           |
|-------|---|---|-----------|
| 41896 | G | T | psaA-ycf3 |
| 41908 | C | T | psaA-ycf3 |
| 42004 | C | T | psaA-ycf3 |
| 42021 | T | C | psaA-ycf3 |
| 42029 | A | G | psaA-ycf3 |
| 42091 | G | A | psaA-ycf3 |
| 42169 | A | G | psaA-ycf3 |
| 42192 | T | C | psaA-ycf3 |
| 42207 | A | C | psaA-ycf3 |
| 42257 | A | C | psaA-ycf3 |
| 42262 | A | G | psaA-ycf3 |
| 42283 | C | T | psaA-ycf3 |
| 42408 | C | T | ycf3      |
| 42484 | T | C | ycf3      |
| 42528 | C | T | ycf3      |
| 42559 | A | C | ycf3      |
| 42560 | T | C | ycf3      |
| 42723 | A | G | ycf3      |
| 42739 | T | A | ycf3      |
| 42742 | A | T | ycf3      |
| 42752 | A | C | ycf3      |
| 42764 | C | T | ycf3      |
| 42892 | T | C | ycf3      |
| 42897 | G | A | ycf3      |
| 42926 | G | A | ycf3      |
| 42929 | A | C | ycf3      |
| 42960 | G | A | ycf3      |
| 42977 | T | G | ycf3      |
| 42994 | C | T | ycf3      |
| 43015 | T | G | ycf3      |
| 43050 | C | T | ycf3      |
| 43218 | A | C | ycf3      |
| 43226 | C | T | ycf3      |
| 43307 | T | C | ycf3      |
| 43434 | C | T | ycf3      |
| 43454 | C | T | ycf3      |
| 43508 | T | C | ycf3      |
| 43616 | T | G | ycf3      |
| 43741 | T | C | ycf3      |
| 43811 | A | G | ycf3      |
| 43998 | A | C | ycf3      |
| 44032 | C | T | ycf3      |
| 44045 | A | G | ycf3      |
| 44200 | T | C | ycf3      |

|       |   |   |           |
|-------|---|---|-----------|
| 44407 | A | C | ycf3-rps4 |
| 44500 | A | G | ycf3-rps4 |
| 44508 | T | G | ycf3-rps4 |
| 44596 | A | G | ycf3-rps4 |
| 44689 | T | G | ycf3-rps4 |
| 44694 | A | G | ycf3-rps4 |
| 44711 | T | C | ycf3-rps4 |
| 44814 | G | T | ycf3-rps4 |
| 44826 | A | G | ycf3-rps4 |
| 44837 | G | A | ycf3-rps4 |
| 44887 | A | G | ycf3-rps4 |
| 44940 | G | T | ycf3-rps4 |
| 44948 | T | C | ycf3-rps4 |
| 45056 | C | A | ycf3-rps4 |
| 45069 | A | C | ycf3-rps4 |
| 45150 | G | A | ycf3-rps4 |
| 45158 | C | T | ycf3-rps4 |
| 45194 | C | T | ycf3-rps4 |
| 45270 | C | T | ycf3-rps4 |
| 45318 | G | T | ycf3-rps4 |
| 45319 | A | C | ycf3-rps4 |
| 45380 | G | T | ycf3-rps4 |
| 45440 | G | A | ycf3-rps4 |
| 45466 | C | T | ycf3-rps4 |
| 45610 | T | C | rps4      |
| 45752 | C | T | rps4      |
| 46047 | C | T | rps4      |
| 46158 | C | A | rps4      |
| 46227 | A | T | rps4-ndhJ |
| 46227 | A | C | rps4-ndhJ |
| 46237 | T | G | rps4-ndhJ |
| 46315 | A | T | rps4-ndhJ |
| 46357 | C | T | rps4-ndhJ |
| 46372 | T | C | rps4-ndhJ |
| 46373 | T | G | rps4-ndhJ |
| 46410 | T | G | rps4-ndhJ |
| 46429 | G | A | rps4-ndhJ |
| 46432 | G | A | rps4-ndhJ |
| 46588 | A | G | rps4-ndhJ |
| 46593 | C | T | rps4-ndhJ |
| 46599 | G | A | rps4-ndhJ |
| 46640 | A | G | rps4-ndhJ |
| 46664 | A | T | rps4-ndhJ |
| 46665 | A | C | rps4-ndhJ |

|       |   |   |           |
|-------|---|---|-----------|
| 46773 | G | T | rps4-ndhJ |
| 46891 | C | T | rps4-ndhJ |
| 46906 | T | G | rps4-ndhJ |
| 46911 | T | G | rps4-ndhJ |
| 46917 | T | G | rps4-ndhJ |
| 46922 | C | A | rps4-ndhJ |
| 46927 | A | C | rps4-ndhJ |
| 46993 | T | G | rps4-ndhJ |
| 47060 | T | G | rps4-ndhJ |
| 47078 | A | G | rps4-ndhJ |
| 47086 | G | A | rps4-ndhJ |
| 47129 | A | G | rps4-ndhJ |
| 47189 | G | A | rps4-ndhJ |
| 47203 | C | T | rps4-ndhJ |
| 47248 | A | C | rps4-ndhJ |
| 47279 | C | A | rps4-ndhJ |
| 47312 | C | T | rps4-ndhJ |
| 47428 | A | G | rps4-ndhJ |
| 47482 | T | G | rps4-ndhJ |
| 47526 | A | G | rps4-ndhJ |
| 47541 | C | A | rps4-ndhJ |
| 47551 | A | G | rps4-ndhJ |
| 47607 | C | T | rps4-ndhJ |
| 47638 | G | A | rps4-ndhJ |
| 47668 | C | G | rps4-ndhJ |
| 47707 | A | C | rps4-ndhJ |
| 47811 | T | C | rps4-ndhJ |
| 47921 | G | A | rps4-ndhJ |
| 47999 | C | T | rps4-ndhJ |
| 48052 | C | T | rps4-ndhJ |
| 48125 | G | T | rps4-ndhJ |
| 48137 | G | T | rps4-ndhJ |
| 48224 | C | T | rps4-ndhJ |
| 48225 | G | A | rps4-ndhJ |
| 48311 | T | G | rps4-ndhJ |
| 48357 | G | A | rps4-ndhJ |
| 48458 | T | G | rps4-ndhJ |
| 48463 | A | C | rps4-ndhJ |
| 48636 | T | C | rps4-ndhJ |
| 48764 | G | T | rps4-ndhJ |
| 48848 | C | T | rps4-ndhJ |
| 48882 | A | G | rps4-ndhJ |
| 48913 | T | C | rps4-ndhJ |
| 48947 | T | G | rps4-ndhJ |

|       |   |   |           |
|-------|---|---|-----------|
| 48954 | C | A | rps4-ndhJ |
| 48965 | G | T | rps4-ndhJ |
| 48994 | C | T | rps4-ndhJ |
| 49036 | T | G | rps4-ndhJ |
| 49044 | C | T | rps4-ndhJ |
| 49045 | C | T | rps4-ndhJ |
| 49071 | T | G | rps4-ndhJ |
| 49072 | C | A | rps4-ndhJ |
| 49342 | T | G | ndhJ      |
| 49465 | C | T | ndhJ      |
| 49549 | C | A | ndhJ      |
| 49608 | T | G | ndhJ-matK |
| 49615 | T | G | ndhJ-matK |
| 49676 | C | T | ndhK      |
| 49697 | A | G | ndhK      |
| 49741 | G | T | ndhK      |
| 49767 | G | T | ndhK      |
| 49877 | G | A | ndhK      |
| 49884 | C | T | ndhK      |
| 50003 | A | C | ndhK      |
| 50060 | T | C | ndhK      |
| 50078 | T | C | ndhK      |
| 50117 | T | G | ndhK      |
| 50156 | A | G | ndhK      |
| 50593 | T | G | ndhC      |
| 50612 | G | A | ndhC      |
| 50696 | T | G | ndhC      |
| 50758 | G | A | ndhC      |
| 50769 | G | A | ndhC-atpE |
| 50803 | C | G | ndhC-atpE |
| 50812 | T | C | ndhC-atpE |
| 50823 | C | T | ndhC-atpE |
| 50876 | A | G | ndhC-atpE |
| 50902 | G | A | ndhC-atpE |
| 50925 | C | T | ndhC-atpE |
| 50959 | G | T | ndhC-atpE |
| 51017 | G | A | ndhC-atpE |
| 51041 | A | T | ndhC-atpE |
| 51043 | T | G | ndhC-atpE |
| 51054 | G | T | ndhC-atpE |
| 51082 | A | C | ndhC-atpE |
| 51088 | C | A | ndhC-atpE |
| 51111 | T | G | ndhC-atpE |
| 51117 | G | A | ndhC-atpE |

|       |   |   |           |
|-------|---|---|-----------|
| 51123 | T | G | ndhC-atpE |
| 51150 | T | G | ndhC-atpE |
| 51165 | G | A | ndhC-atpE |
| 51206 | G | A | ndhC-atpE |
| 51214 | G | A | ndhC-atpE |
| 51235 | G | T | ndhC-atpE |
| 51249 | A | C | ndhC-atpE |
| 51292 | T | C | ndhC-atpE |
| 51297 | G | A | ndhC-atpE |
| 51503 | T | C | ndhC-atpE |
| 51575 | A | C | ndhC-atpE |
| 51597 | C | A | ndhC-atpE |
| 51625 | T | G | ndhC-atpE |
| 51627 | A | C | ndhC-atpE |
| 51628 | G | A | ndhC-atpE |
| 51660 | G | T | ndhC-atpE |
| 51678 | A | G | ndhC-atpE |
| 51730 | G | T | ndhC-atpE |
| 51794 | A | T | ndhC-atpE |
| 51794 | A | C | ndhC-atpE |
| 51815 | T | C | ndhC-atpE |
| 51863 | A | C | ndhC-atpE |
| 51929 | C | T | ndhC-atpE |
| 52044 | T | G | ndhC-atpE |
| 52062 | T | G | ndhC-atpE |
| 52091 | A | G | ndhC-atpE |
| 52274 | T | G | ndhC-atpE |
| 52346 | G | A | ndhC-atpE |
| 52472 | C | A | ndhC-atpE |
| 52481 | G | A | ndhC-atpE |
| 52543 | C | T | ndhC-atpE |
| 52593 | T | C | ndhC-atpE |
| 52615 | C | T | ndhC-atpE |
| 52621 | C | T | ndhC-atpE |
| 52708 | C | G | ndhC-atpE |
| 52799 | T | C | ndhC-atpE |
| 53011 | C | T | atpE      |
| 53084 | C | A | atpE      |
| 53168 | G | T | atpE      |
| 53246 | C | A | atpE      |
| 53815 | A | C | atpB      |
| 53827 | C | T | atpB      |
| 53836 | T | C | atpB      |
| 54289 | G | T | atpB      |

|       |   |   |           |
|-------|---|---|-----------|
| 54586 | A | G | atpB      |
| 54603 | G | A | atpB      |
| 54700 | C | T | atpB      |
| 54703 | C | T | atpB      |
| 54750 | C | T | atpB      |
| 54952 | T | G | atpB-rbcL |
| 54970 | A | G | atpB-rbcL |
| 55003 | A | G | atpB-rbcL |
| 55066 | A | G | atpB-rbcL |
| 55122 | A | C | atpB-rbcL |
| 55244 | T | G | atpB-rbcL |
| 55267 | A | G | atpB-rbcL |
| 55275 | C | T | atpB-rbcL |
| 55344 | A | C | atpB-rbcL |
| 55400 | A | C | atpB-rbcL |
| 55407 | A | C | atpB-rbcL |
| 55663 | G | A | rbcL      |
| 55719 | C | G | rbcL      |
| 55806 | T | A | rbcL      |
| 55941 | T | C | rbcL      |
| 55950 | T | C | rbcL      |
| 56017 | T | C | rbcL      |
| 56024 | C | T | rbcL      |
| 56164 | T | C | rbcL      |
| 56189 | C | A | rbcL      |
| 56245 | T | C | rbcL      |
| 56267 | A | C | rbcL      |
| 56299 | G | A | rbcL      |
| 56498 | T | G | rbcL      |
| 56518 | A | G | rbcL      |
| 56653 | A | G | rbcL      |
| 56761 | G | A | rbcL      |
| 56782 | A | C | rbcL      |
| 56844 | A | C | rbcL      |
| 57069 | T | G | rbcL-psaI |
| 57137 | C | T | rbcL-psaI |
| 57139 | C | A | rbcL-psaI |
| 57248 | T | C | rbcL-psaI |
| 57258 | C | T | rbcL-psaI |
| 57281 | C | T | rbcL-psaI |
| 57331 | T | G | rbcL-psaI |
| 57413 | C | T | rbcL-psaI |
| 57431 | G | T | rbcL-psaI |
| 57438 | A | C | rbcL-psaI |

|       |   |   |           |
|-------|---|---|-----------|
| 57463 | G | C | rbcL-psaI |
| 57503 | A | C | rbcL-psaI |
| 57508 | T | G | rbcL-psaI |
| 57512 | C | T | rbcL-psaI |
| 57559 | T | C | rbcL-psaI |
| 57567 | C | A | rbcL-psaI |
| 57647 | A | G | rbcL-psaI |
| 57658 | C | T | rbcL-psaI |
| 57679 | G | A | rbcL-psaI |
| 57687 | G | A | rbcL-psaI |
| 57688 | G | A | rbcL-psaI |
| 57731 | G | A | rbcL-psaI |
| 57766 | T | G | rbcL-psaI |
| 57811 | A | C | rbcL-psaI |
| 57924 | G | A | rbcL-psaI |
| 57974 | C | T | rbcL-psaI |
| 58118 | C | A | rbcL-psaI |
| 58148 | A | G | rbcL-psaI |
| 58179 | A | C | rbcL-psaI |
| 58197 | T | G | rbcL-psaI |
| 58207 | G | A | rbcL-psaI |
| 58292 | T | G | rbcL-psaI |
| 58293 | G | A | rbcL-psaI |
| 58360 | G | A | rbcL-psaI |
| 58368 | T | C | rbcL-psaI |
| 58433 | G | A | rbcL-psaI |
| 58448 | G | A | rbcL-psaI |
| 58470 | A | G | rbcL-psaI |
| 58472 | T | C | rbcL-psaI |
| 58506 | C | T | rbcL-psaI |
| 58530 | A | T | rbcL-psaI |
| 58550 | A | T | rbcL-psaI |
| 58593 | G | T | rbcL-psaI |
| 58626 | T | G | rbcL-psaI |
| 58633 | C | A | rbcL-psaI |
| 58648 | A | G | rbcL-psaI |
| 58699 | G | A | rbcL-psaI |
| 58729 | A | G | rbcL-psaI |
| 58784 | C | T | rbcL-psaI |
| 58791 | G | A | rbcL-psaI |
| 58964 | C | T | rbcL-psaI |
| 58967 | G | A | rbcL-psaI |
| 58985 | C | T | rbcL-psaI |
| 58987 | C | T | rbcL-psaI |

|       |   |   |           |
|-------|---|---|-----------|
| 59013 | G | A | rbcL-psaI |
| 59114 | A | G | rbcL-psaI |
| 59147 | G | T | rbcL-psaI |
| 59172 | A | C | rbcL-psaI |
| 59195 | A | C | rbcL-psaI |
| 59210 | T | C | rbcL-psaI |
| 59228 | C | A | rbcL-psaI |
| 59231 | G | A | rbcL-psaI |
| 59315 | A | C | rbcL-psaI |
| 59402 | A | C | rbcL-psaI |
| 59430 | C | A | rbcL-psaI |
| 59455 | C | T | rbcL-psaI |
| 59519 | C | A | rbcL-psaI |
| 59545 | G | A | rbcL-psaI |
| 59551 | G | T | rbcL-psaI |
| 59603 | T | G | rbcL-psaI |
| 59624 | A | T | rbcL-psaI |
| 59630 | A | C | rbcL-psaI |
| 59705 | T | C | rbcL-psaI |
| 59771 | A | G | psaI      |
| 59816 | G | A | psaI      |
| 60203 | C | A | ycf4      |
| 60221 | A | C | ycf4      |
| 60308 | G | T | ycf4      |
| 60468 | T | C | ycf4      |
| 60559 | A | G | ycf4      |
| 60664 | T | G | ycf4      |
| 60688 | C | T | ycf4      |
| 60698 | C | A | ycf4      |
| 60712 | A | C | ycf4      |
| 60747 | G | A | ycf4-cemA |
| 60763 | A | C | ycf4-cemA |
| 60766 | G | A | ycf4-cemA |
| 60869 | A | C | ycf4-cemA |
| 60874 | T | G | ycf4-cemA |
| 60932 | C | T | ycf4-cemA |
| 60949 | T | G | ycf4-cemA |
| 60971 | T | G | ycf4-cemA |
| 61029 | G | T | ycf4-cemA |
| 61077 | T | C | ycf4-cemA |
| 61173 | A | C | ycf4-cemA |
| 61196 | A | G | ycf4-cemA |
| 61210 | A | C | ycf4-cemA |
| 61223 | G | T | ycf4-cemA |



|       |   |   |           |
|-------|---|---|-----------|
| 61242 | G | A | cemA      |
| 61283 | G | T | cemA      |
| 61406 | A | C | cemA      |
| 61421 | C | T | cemA      |
| 61520 | C | T | cemA      |
| 61838 | T | G | cemA      |
| 61961 | G | A | cemA-petA |
| 61977 | G | T | cemA-petA |
| 62021 | G | A | cemA-petA |
| 62058 | T | G | cemA-petA |
| 62079 | C | T | cemA-petA |
| 62104 | A | C | cemA-petA |
| 62111 | C | T | cemA-petA |
| 62141 | G | A | cemA-petA |
| 62223 | A | C | petA      |
| 62314 | G | A | petA      |
| 62326 | C | T | petA      |
| 62344 | C | T | petA      |
| 62354 | G | A | petA      |
| 62530 | T | G | petA      |
| 62554 | G | A | petA      |
| 62632 | C | A | petA      |
| 62692 | C | T | petA      |
| 62915 | A | C | petA      |
| 62922 | T | G | petA      |
| 62927 | C | G | petA      |
| 62975 | G | A | petA      |
| 63001 | A | C | petA      |
| 63121 | G | A | petA-psbJ |
| 63150 | A | G | petA-psbJ |
| 63165 | G | A | petA-psbJ |
| 63167 | G | A | petA-psbJ |
| 63181 | C | A | petA-psbJ |
| 63191 | T | G | petA-psbJ |
| 63200 | A | C | petA-psbJ |
| 63200 | A | T | petA-psbJ |
| 63256 | C | T | petA-psbJ |
| 63301 | C | A | petA-psbJ |
| 63321 | T | A | petA-psbJ |
| 63355 | T | G | petA-psbJ |
| 63400 | A | C | petA-psbJ |
| 63404 | C | T | petA-psbJ |
| 63523 | C | T | petA-psbJ |
| 63547 | C | A | petA-psbJ |

|       |   |   |           |
|-------|---|---|-----------|
| 63554 | C | T | petA-psbJ |
| 63578 | G | A | petA-psbJ |
| 63606 | C | T | petA-psbJ |
| 63671 | T | C | petA-psbJ |
| 63699 | C | T | petA-psbJ |
| 63741 | T | C | petA-psbJ |
| 63770 | T | G | petA-psbJ |
| 63781 | C | A | petA-psbJ |
| 63838 | A | C | petA-psbJ |
| 63857 | T | C | petA-psbJ |
| 63863 | T | C | petA-psbJ |
| 63891 | A | C | petA-psbJ |
| 63948 | C | T | petA-psbJ |
| 63988 | T | G | petA-psbJ |
| 63989 | G | A | petA-psbJ |
| 64029 | G | T | petA-psbJ |
| 64051 | T | C | petA-psbJ |
| 64094 | C | A | petA-psbJ |
| 64266 | T | C | psbJ-psbL |
| 64323 | A | G | psbJ-psbL |
| 64327 | T | C | psbJ-psbL |
| 64575 | G | A | psbF      |
| 64646 | G | C | psbF      |
| 64739 | C | T | psbE      |
| 64778 | A | G | psbE      |
| 64981 | G | T | psbE-petL |
| 64982 | A | C | psbE-petL |
| 65092 | C | T | psbE-petL |
| 65134 | C | T | psbE-petL |
| 65151 | A | G | psbE-petL |
| 65163 | T | G | psbE-petL |
| 65168 | C | T | psbE-petL |
| 65192 | G | T | psbE-petL |
| 65198 | G | T | psbE-petL |
| 65208 | G | T | psbE-petL |
| 65231 | T | G | psbE-petL |
| 65240 | G | A | psbE-petL |
| 65251 | G | T | psbE-petL |
| 65259 | C | T | psbE-petL |
| 65292 | C | A | psbE-petL |
| 65295 | T | C | psbE-petL |
| 65314 | A | G | psbE-petL |
| 65343 | A | G | psbE-petL |
| 65346 | C | A | psbE-petL |

|       |   |   |           |
|-------|---|---|-----------|
| 65347 | C | A | psbE-petL |
| 65366 | A | C | psbE-petL |
| 65372 | G | C | psbE-petL |
| 65373 | T | G | psbE-petL |
| 65374 | C | A | psbE-petL |
| 65430 | A | C | psbE-petL |
| 65463 | G | A | psbE-petL |
| 65502 | G | T | psbE-petL |
| 65513 | A | C | psbE-petL |
| 65548 | G | C | psbE-petL |
| 65570 | A | C | psbE-petL |
| 65616 | A | C | psbE-petL |
| 65626 | C | A | psbE-petL |
| 65663 | A | C | psbE-petL |
| 65678 | G | T | psbE-petL |
| 65679 | A | G | psbE-petL |
| 65679 | A | T | psbE-petL |
| 65682 | C | T | psbE-petL |
| 65706 | A | C | psbE-petL |
| 65712 | A | C | psbE-petL |
| 65718 | A | G | psbE-petL |
| 65770 | G | A | psbE-petL |
| 65792 | C | T | psbE-petL |
| 65855 | A | C | psbE-petL |
| 65860 | G | A | psbE-petL |
| 65865 | A | C | psbE-petL |
| 65890 | C | T | psbE-petL |
| 65935 | A | G | psbE-petL |
| 65969 | A | C | psbE-petL |
| 65975 | A | C | psbE-petL |
| 66090 | T | G | petL-petG |
| 66138 | G | A | petL-petG |
| 66175 | A | C | petL-petG |
| 66343 | G | A | petG-psaJ |
| 66370 | C | T | petG-psaJ |
| 66386 | G | A | petG-psaJ |
| 66571 | T | G | petG-psaJ |
| 66575 | G | A | petG-psaJ |
| 66619 | A | C | petG-psaJ |
| 66625 | A | C | petG-psaJ |
| 66635 | T | G | petG-psaJ |
| 66668 | C | G | petG-psaJ |
| 66861 | A | T | petG-psaJ |
| 66905 | C | G | petG-psaJ |

|       |   |   |             |
|-------|---|---|-------------|
| 66945 | T | G | petG-psaJ   |
| 66956 | A | C | petG-psaJ   |
| 66963 | G | A | petG-psaJ   |
| 66995 | A | G | petG-psaJ   |
| 67006 | A | G | petG-psaJ   |
| 67073 | C | G | petG-psaJ   |
| 67096 | C | T | petG-psaJ   |
| 67176 | A | C | petG-psaJ   |
| 67306 | A | G | psaJ        |
| 67318 | G | T | psaJ        |
| 67375 | A | C | psaJ-rpl33  |
| 67485 | T | G | psaJ-rpl33  |
| 67489 | A | T | psaJ-rpl33  |
| 67549 | T | G | psaJ-rpl33  |
| 67605 | C | T | psaJ-rpl33  |
| 67635 | A | C | psaJ-rpl33  |
| 67638 | T | G | psaJ-rpl33  |
| 67693 | T | C | psaJ-rpl33  |
| 67833 | T | C | rpl33       |
| 67840 | A | C | rpl33       |
| 67895 | A | G | rpl33       |
| 67949 | C | T | rpl33       |
| 67951 | A | G | rpl33       |
| 68026 | T | C | rpl33-rps18 |
| 68084 | A | C | rpl33-rps18 |
| 68164 | A | G | rpl33-rps18 |
| 68205 | C | A | rps18       |
| 68255 | T | C | rps18       |
| 68450 | T | C | rps18       |
| 68452 | A | G | rps18       |
| 68464 | G | C | rps18       |
| 68533 | T | C | rps18-rpl20 |
| 68559 | G | A | rps18-rpl20 |
| 68571 | G | A | rps18-rpl20 |
| 68592 | G | A | rps18-rpl20 |
| 68607 | G | A | rps18-rpl20 |
| 68692 | C | A | rps18-rpl20 |
| 68714 | G | T | rps18-rpl20 |
| 68734 | C | T | rps18-rpl20 |
| 68775 | G | T | rps18-rpl20 |
| 68922 | G | A | rpl20       |
| 68968 | A | C | rpl20       |
| 69063 | G | A | rpl20       |
| 69107 | C | T | rpl20-rps12 |

|       |   |   |             |
|-------|---|---|-------------|
| 69151 | T | C | rpl20-rps12 |
| 69248 | A | C | rpl20-rps12 |
| 69309 | T | G | rpl20-rps12 |
| 69314 | T | G | rpl20-rps12 |
| 69368 | C | A | rpl20-rps12 |
| 69411 | G | A | rpl20-rps12 |
| 69447 | A | C | rpl20-rps12 |
| 69454 | A | C | rpl20-rps12 |
| 69547 | C | T | rpl20-rps12 |
| 69588 | A | G | rpl20-rps12 |
| 69608 | T | C | rpl20-rps12 |
| 69620 | G | A | rpl20-rps12 |
| 69699 | G | T | rpl20-rps12 |
| 69704 | T | G | rpl20-rps12 |
| 69767 | G | T | rpl20-rps12 |
| 69776 | A | C | rpl20-rps12 |
| 69810 | T | G | rpl20-rps12 |
| 69825 | T | C | rpl20-rps12 |
| 69853 | A | T | rpl20-rps12 |
| 69874 | C | T | rpl20-rps12 |
| 70066 | A | C | rps12-clpP  |
| 70081 | T | A | rps12-clpP  |
| 70086 | A | T | rps12-clpP  |
| 70100 | G | T | rps12-clpP  |
| 70106 | C | T | rps12-clpP  |
| 70133 | C | T | rps12-clpP  |
| 70268 | A | G | clpP        |
| 70307 | C | T | clpP        |
| 70370 | G | A | clpP        |
| 70409 | T | G | clpP        |
| 70441 | G | C | clpP        |
| 70441 | G | A | clpP        |
| 70472 | A | C | clpP        |
| 70544 | A | C | clpP        |
| 70629 | T | G | clpP        |
| 70648 | C | T | clpP        |
| 70650 | G | A | clpP        |
| 70674 | C | T | clpP        |
| 70736 | C | T | clpP        |
| 70753 | T | G | clpP        |
| 70762 | A | C | clpP        |
| 70795 | G | T | clpP        |
| 70805 | C | T | clpP        |
| 70853 | A | C | clpP        |

|       |   |   |           |
|-------|---|---|-----------|
| 70857 | G | T | clpP      |
| 70901 | T | G | clpP      |
| 70925 | T | G | clpP      |
| 70968 | A | G | clpP      |
| 71027 | T | G | clpP      |
| 71108 | T | C | clpP      |
| 71152 | T | G | clpP      |
| 71276 | T | C | clpP      |
| 71403 | G | A | clpP      |
| 71491 | G | A | clpP      |
| 71529 | C | T | clpP      |
| 71556 | G | A | clpP      |
| 71578 | C | A | clpP      |
| 71583 | A | C | clpP      |
| 71628 | T | G | clpP      |
| 71740 | C | T | clpP      |
| 71763 | A | C | clpP      |
| 71769 | G | T | clpP      |
| 71770 | A | C | clpP      |
| 71776 | C | A | clpP      |
| 71791 | T | C | clpP      |
| 71829 | T | C | clpP      |
| 71842 | G | T | clpP      |
| 71845 | C | T | clpP      |
| 71943 | A | C | clpP      |
| 72001 | T | G | clpP      |
| 72017 | A | G | clpP      |
| 72045 | C | T | clpP      |
| 72056 | T | G | clpP      |
| 72070 | A | C | clpP      |
| 72120 | T | C | clpP      |
| 72124 | C | T | clpP      |
| 72397 | A | G | clpP-psbB |
| 72542 | G | C | clpP-psbB |
| 72587 | C | T | clpP-psbB |
| 72645 | G | T | clpP-psbB |
| 72679 | C | T | clpP-psbB |
| 72935 | C | T | psbB      |
| 73274 | T | C | psbB      |
| 73367 | C | T | psbB      |
| 73370 | G | A | psbB      |
| 73436 | T | C | psbB      |
| 73601 | A | C | psbB      |
| 73608 | G | A | psbB      |

|       |   |   |           |
|-------|---|---|-----------|
| 73652 | A | C | psbB      |
| 73733 | G | A | psbB      |
| 73757 | A | C | psbB      |
| 74012 | G | T | psbB      |
| 74231 | C | T | psbB      |
| 74245 | T | C | psbB-psbT |
| 74366 | C | A | psbB-psbT |
| 74596 | T | C | psbN      |
| 74599 | G | A | psbN      |
| 74819 | G | A | psbN-psbH |
| 74850 | T | C | psbH      |
| 74919 | G | A | psbH      |
| 75051 | G | T | psbH      |
| 75066 | A | G | psbH-petB |
| 75281 | G | A | petB      |
| 75317 | G | A | petB      |
| 75393 | T | A | petB      |
| 75406 | G | T | petB      |
| 75419 | A | G | petB      |
| 75465 | T | G | petB      |
| 75504 | G | A | petB      |
| 75510 | A | G | petB      |
| 75653 | T | G | petB      |
| 75697 | C | T | petB      |
| 75709 | T | G | petB      |
| 75887 | G | A | petB      |
| 75899 | T | G | petB      |
| 76361 | A | G | petB      |
| 76662 | A | C | petB-petD |
| 76725 | A | C | petB-petD |
| 76744 | C | T | petB-petD |
| 76845 | C | T | petD-rpoA |
| 76847 | G | A | petD-rpoA |
| 76930 | A | G | petD-rpoA |
| 77075 | G | A | petD-rpoA |
| 77086 | A | C | petD-rpoA |
| 77159 | C | G | petD-rpoA |
| 77245 | C | T | petD-rpoA |
| 77320 | T | C | petD-rpoA |
| 77350 | A | C | petD-rpoA |
| 77379 | C | A | petD-rpoA |
| 77395 | T | C | petD-rpoA |
| 77396 | G | T | petD-rpoA |
| 77477 | C | T | petD-rpoA |

|       |   |   |             |
|-------|---|---|-------------|
| 77613 | T | C | petD-rpoA   |
| 77721 | A | C | petD-rpoA   |
| 77907 | T | C | petD-rpoA   |
| 77970 | T | C | petD-rpoA   |
| 77986 | G | A | petD-rpoA   |
| 78009 | G | A | petD-rpoA   |
| 78030 | C | T | petD-rpoA   |
| 78078 | G | T | petD-rpoA   |
| 78080 | A | C | petD-rpoA   |
| 78093 | A | G | petD-rpoA   |
| 78114 | G | T | petD-rpoA   |
| 78279 | A | T | petD-rpoA   |
| 78285 | A | C | rpoA        |
| 78477 | T | G | rpoA        |
| 78567 | G | C | rpoA        |
| 78567 | G | A | rpoA        |
| 78625 | T | C | rpoA        |
| 78639 | A | G | rpoA        |
| 78762 | C | T | rpoA        |
| 78965 | G | A | rpoA        |
| 78990 | T | G | rpoA        |
| 79008 | C | T | rpoA        |
| 79097 | A | G | rpoA        |
| 79131 | C | T | rpoA        |
| 79132 | T | C | rpoA        |
| 79135 | T | G | rpoA        |
| 79153 | G | A | rpoA        |
| 79158 | T | C | rpoA        |
| 79209 | G | A | rpoA        |
| 79336 | C | A | rpoA-rps11  |
| 79358 | T | C | rps11       |
| 79366 | T | G | rps11       |
| 79367 | A | G | rps11       |
| 79400 | G | T | rps11       |
| 79550 | G | A | rps11       |
| 79717 | C | T | rps11       |
| 79720 | C | T | rps11       |
| 79734 | T | C | rps11       |
| 79736 | C | T | rps11       |
| 79749 | G | A | rps11       |
| 79836 | C | T | rps11-rpl36 |
| 79837 | A | G | rps11-rpl36 |
| 79908 | T | C | rpl36       |
| 79968 | G | T | rpl36       |



|       |   |   |             |
|-------|---|---|-------------|
| 80012 | G | T | rpl36-rps8  |
| 80024 | G | A | rpl36-rps8  |
| 80041 | G | T | rpl36-rps8  |
| 80042 | A | C | rpl36-rps8  |
| 80071 | G | A | rpl36-rps8  |
| 80106 | T | C | rpl36-rps8  |
| 80132 | G | T | rpl36-rps8  |
| 80209 | C | T | rpl36-rps8  |
| 80232 | A | C | rpl36-rps8  |
| 80235 | G | T | rpl36-rps8  |
| 80274 | C | T | rpl36-rps8  |
| 80393 | A | C | rpl36-rps8  |
| 80398 | C | A | rpl36-rps8  |
| 80410 | G | A | rpl36-rps8  |
| 80419 | C | A | rpl36-rps8  |
| 80445 | T | C | rpl36-rps8  |
| 80503 | T | C | rps8        |
| 80537 | G | T | rps8        |
| 80547 | C | G | rps8        |
| 80586 | A | C | rps8        |
| 80598 | T | C | rps8        |
| 80642 | G | A | rps8        |
| 80653 | C | A | rps8        |
| 80668 | C | T | rps8        |
| 80811 | C | T | rps8        |
| 80847 | A | G | rps8        |
| 80918 | A | T | rps8-rpl14  |
| 80943 | G | T | rps8-rpl14  |
| 80945 | T | G | rps8-rpl14  |
| 80951 | T | G | rps8-rpl14  |
| 81011 | T | C | rps8-rpl14  |
| 81456 | G | A | rpl14-rpl16 |
| 81576 | C | T | rpl16       |
| 81599 | T | C | rpl16       |
| 81621 | T | C | rpl16       |
| 81930 | G | C | rpl16       |
| 82033 | G | A | rpl16       |
| 82083 | A | C | rpl16       |
| 82115 | G | T | rpl16       |
| 82161 | T | C | rpl16       |
| 82172 | T | G | rpl16       |
| 82173 | A | C | rpl16       |
| 82200 | C | T | rpl16       |
| 82206 | A | C | rpl16       |

|        |   |   |             |
|--------|---|---|-------------|
| 82268  | G | A | rpl16       |
| 82322  | T | G | rpl16       |
| 82335  | C | T | rpl16       |
| 82352  | A | T | rpl16       |
| 82356  | G | T | rpl16       |
| 82445  | T | C | rpl16       |
| 82458  | G | T | rpl16       |
| 82475  | C | A | rpl16       |
| 82570  | C | A | rpl16       |
| 82637  | G | T | rpl16       |
| 82681  | C | A | rpl16       |
| 82689  | T | C | rpl16       |
| 82728  | G | T | rpl16       |
| 82751  | T | A | rpl16       |
| 82766  | C | A | rpl16       |
| 82803  | T | G | rpl16       |
| 82812  | G | T | rpl16       |
| 82813  | A | C | rpl16       |
| 82828  | C | T | rpl16       |
| 82893  | C | T | rpl16       |
| 82966  | T | A | rpl16-rps3  |
| 83008  | A | C | rpl16-rps3  |
| 83009  | A | G | rpl16-rps3  |
| 83039  | A | G | rpl16-rps3  |
| 83135  | C | T | rps3        |
| 83190  | G | A | rps3        |
| 83321  | C | T | rps3        |
| 83531  | T | G | rps3        |
| 83688  | C | T | rps3        |
| 83719  | A | C | rps3        |
| 83747  | C | T | rps3        |
| 83797  | C | T | rpl22       |
| 83970  | C | T | rpl22       |
| 83996  | G | T | rpl22       |
| 84132  | C | T | rpl22       |
| 84245  | C | T | rpl22-rps19 |
| 84344  | T | C | rps19       |
| 84361  | T | A |             |
| 84488  | C | A | rps19       |
| 84624  | A | C | rpl2        |
| 109549 | A | G | ndhF        |
| 109672 | G | A | ndhF        |
| 109687 | G | A | ndhF        |
| 109731 | T | C | ndhF        |

|        |   |   |            |
|--------|---|---|------------|
| 109737 | C | G | ndhF       |
| 109762 | C | T | ndhF       |
| 109820 | G | T | ndhF       |
| 109861 | G | A | ndhF       |
| 109962 | T | G | ndhF       |
| 109986 | T | G | ndhF       |
| 109997 | T | G | ndhF       |
| 110078 | A | G | ndhF       |
| 110113 | A | G | ndhF       |
| 110199 | T | C | ndhF       |
| 110283 | T | C | ndhF       |
| 110301 | C | T | ndhF       |
| 110580 | G | C | ndhF       |
| 110591 | A | G | ndhF       |
| 110625 | C | T | ndhF       |
| 110644 | T | C | ndhF       |
| 110751 | C | G | ndhF       |
| 110807 | G | A | ndhF       |
| 110814 | G | A | ndhF       |
| 110966 | T | C | ndhF       |
| 110979 | T | C | ndhF       |
| 111113 | G | T | ndhF       |
| 111152 | T | C | ndhF       |
| 111178 | A | T | ndhF       |
| 111292 | C | A | ndhF-rpl32 |
| 111304 | T | G | ndhF-rpl32 |
| 111308 | C | T | ndhF-rpl32 |
| 111329 | G | A | ndhF-rpl32 |
| 111330 | G | A | ndhF-rpl32 |
| 111372 | T | G | ndhF-rpl32 |
| 111429 | T | C | ndhF-rpl32 |
| 111505 | T | G | ndhF-rpl32 |
| 111507 | G | A | ndhF-rpl32 |
| 111515 | C | T | ndhF-rpl32 |
| 111552 | C | A | ndhF-rpl32 |
| 111610 | T | G | ndhF-rpl32 |
| 111618 | A | T | ndhF-rpl32 |
| 111620 | A | T | ndhF-rpl32 |
| 111621 | T | G | ndhF-rpl32 |
| 111642 | A | G | ndhF-rpl32 |
| 111670 | A | T | ndhF-rpl32 |
| 111681 | T | C | ndhF-rpl32 |
| 111711 | A | T | ndhF-rpl32 |
| 111721 | A | T | ndhF-rpl32 |

|        |   |   |            |
|--------|---|---|------------|
| 111729 | T | C | ndhF-rpl32 |
| 111739 | T | A | ndhF-rpl32 |
| 111740 | T | A | ndhF-rpl32 |
| 111744 | T | A | ndhF-rpl32 |
| 111746 | G | A | ndhF-rpl32 |
| 111750 | C | T | ndhF-rpl32 |
| 111756 | C | T | ndhF-rpl32 |
| 111757 | A | C | ndhF-rpl32 |
| 111778 | G | T | ndhF-rpl32 |
| 111783 | C | A | ndhF-rpl32 |
| 111784 | T | A | ndhF-rpl32 |
| 111786 | C | A | ndhF-rpl32 |
| 111816 | C | A | ndhF-rpl32 |
| 111834 | T | G | ndhF-rpl32 |
| 111835 | C | A | ndhF-rpl32 |
| 111851 | A | T | ndhF-rpl32 |
| 111856 | T | C | ndhF-rpl32 |
| 111892 | G | T | ndhF-rpl32 |
| 111900 | C | T | ndhF-rpl32 |
| 111901 | A | G | ndhF-rpl32 |
| 111917 | T | G | ndhF-rpl32 |
| 111921 | T | G | ndhF-rpl32 |
| 111922 | C | T | ndhF-rpl32 |
| 111941 | G | A | ndhF-rpl32 |
| 111942 | C | T | ndhF-rpl32 |
| 111997 | G | A | ndhF-rpl32 |
| 112086 | C | T | rpl32      |
| 112087 | A | G | rpl32      |
| 112211 | C | A | rpl32-ccsA |
| 112219 | G | T | rpl32-ccsA |
| 112239 | C | G | rpl32-ccsA |
| 112250 | C | T | rpl32-ccsA |
| 112306 | A | C | rpl32-ccsA |
| 112369 | T | G | rpl32-ccsA |
| 112389 | G | T | rpl32-ccsA |
| 112451 | T | G | rpl32-ccsA |
| 112524 | C | T | rpl32-ccsA |
| 112546 | A | G | rpl32-ccsA |
| 112559 | T | G | rpl32-ccsA |
| 112576 | T | A | rpl32-ccsA |
| 112598 | T | G | rpl32-ccsA |
| 112599 | A | C | rpl32-ccsA |
| 112745 | T | G | rpl32-ccsA |
| 112759 | T | G | rpl32-ccsA |

|        |   |   |            |
|--------|---|---|------------|
| 112765 | A | G | rpl32-ccsA |
| 112766 | G | A | rpl32-ccsA |
| 112782 | C | A | rpl32-ccsA |
| 112816 | T | C | rpl32-ccsA |
| 112829 | A | T | rpl32-ccsA |
| 112876 | A | C | ccsA       |
| 112922 | C | T | ccsA       |
| 112932 | C | T | ccsA       |
| 112976 | T | C | ccsA       |
| 113112 | A | T | ccsA       |
| 113184 | G | A | ccsA       |
| 113295 | C | T | ccsA       |
| 113316 | A | G | ccsA       |
| 113350 | C | T | ccsA       |
| 113361 | T | C | ccsA       |
| 113372 | G | T | ccsA       |
| 113385 | T | G | ccsA       |
| 113391 | T | A | ccsA       |
| 113414 | C | A | ccsA       |
| 113441 | G | A | ccsA       |
| 113450 | A | C | ccsA       |
| 113462 | T | C | ccsA       |
| 113675 | C | A | ccsA       |
| 113677 | A | C | ccsA       |
| 113692 | G | A | ccsA       |
| 113769 | T | C | ccsA       |
| 113928 | A | G | ccsA-ndhD  |
| 113950 | A | C | ccsA-ndhD  |
| 113973 | T | G | ccsA-ndhD  |
| 113975 | G | C | ccsA-ndhD  |
| 113976 | G | C | ccsA-ndhD  |
| 114018 | C | A | ccsA-ndhD  |
| 114047 | T | G | ndhD       |
| 114105 | C | G | ndhD       |
| 114147 | T | G | ndhD       |
| 114151 | G | A | ndhD       |
| 114175 | T | C | ndhD       |
| 114191 | G | T | ndhD       |
| 114193 | A | C | ndhD       |
| 114239 | A | G | ndhD       |
| 114279 | T | C | ndhD       |
| 114300 | A | G | ndhD       |
| 114321 | A | G | ndhD       |
| 114322 | A | T | ndhD       |

|        |   |   |           |
|--------|---|---|-----------|
| 114323 | T | A | ndhD      |
| 114337 | T | G | ndhD      |
| 114498 | C | T | ndhD      |
| 114573 | T | C | ndhD      |
| 114588 | T | C | ndhD      |
| 114628 | A | G | ndhD      |
| 114718 | A | C | ndhD      |
| 114843 | C | T | ndhD      |
| 114964 | T | G | ndhD      |
| 115042 | C | T | ndhD      |
| 115072 | T | C | ndhD      |
| 115081 | G | C | ndhD      |
| 115177 | A | G | ndhD      |
| 115249 | C | A | ndhD      |
| 115326 | C | G | ndhD      |
| 115326 | C | T | ndhD      |
| 115384 | G | A | ndhD      |
| 115405 | G | A | ndhD      |
| 115457 | A | G | ndhD      |
| 115483 | G | A | ndhD      |
| 115517 | G | A | ndhD      |
| 115570 | G | A | ndhD-psaC |
| 115629 | G | A | ndhD-psaC |
| 115758 | A | G | psaC      |
| 115937 | A | G | psaC-ndhE |
| 115948 | T | G | psaC-ndhE |
| 115987 | C | A | psaC-ndhE |
| 115995 | A | C | psaC-ndhE |
| 116002 | A | G | psaC-ndhE |
| 116031 | A | C | psaC-ndhE |
| 116037 | G | T | psaC-ndhE |
| 116067 | T | G | psaC-ndhE |
| 116116 | T | C | psaC-ndhE |
| 116139 | C | T | psaC-ndhE |
| 116161 | T | G | psaC-ndhE |
| 116162 | A | C | psaC-ndhE |
| 116180 | A | C | psaC-ndhE |
| 116361 | A | C | ndhE      |
| 116481 | G | T | ndhE      |
| 116573 | G | A | ndhE-ndhG |
| 116597 | T | G | ndhE-ndhG |
| 116603 | T | C | ndhE-ndhG |
| 116624 | C | T | ndhE-ndhG |
| 116638 | G | A | ndhE-ndhG |

|        |   |   |           |
|--------|---|---|-----------|
| 116656 | T | C | ndhE-ndhG |
| 116675 | T | C | ndhE-ndhG |
| 116920 | C | T | ndhG      |
| 116958 | C | T | ndhG      |
| 116967 | A | C | ndhG      |
| 116996 | C | T | ndhG      |
| 117014 | G | A | ndhG      |
| 117080 | T | C | ndhG      |
| 117168 | G | A | ndhG      |
| 117199 | C | A | ndhG      |
| 117289 | A | G | ndhG-ndhI |
| 117360 | G | A | ndhG-ndhI |
| 117369 | G | T | ndhG-ndhI |
| 117370 | G | A | ndhG-ndhI |
| 117383 | C | A | ndhG-ndhI |
| 117483 | T | G | ndhG-ndhI |
| 117488 | G | A | ndhG-ndhI |
| 117510 | C | T | ndhG-ndhI |
| 117520 | T | G | ndhG-ndhI |
| 117607 | T | G | ndhI      |
| 117636 | A | C | ndhI      |
| 117637 | T | C | ndhI      |
| 117739 | A | G | ndhI      |
| 117841 | A | G | ndhI      |
| 117850 | G | T | ndhI      |
| 117881 | G | A | ndhI      |
| 117990 | G | A | ndhI      |
| 118027 | T | C | ndhI      |
| 118150 | G | T | ndhI-ndhA |
| 118154 | C | T | ndhI-ndhA |
| 118166 | T | C | ndhA      |
| 118185 | G | A | ndhA      |
| 118261 | A | G | ndhA      |
| 118363 | C | T | ndhA      |
| 118368 | G | T | ndhA      |
| 118424 | T | C | ndhA      |
| 118705 | G | A | ndhA      |
| 118745 | C | T | ndhA      |
| 118816 | G | T | ndhA      |
| 118846 | T | C | ndhA      |
| 118965 | A | C | ndhA      |
| 119085 | G | C | ndhA      |
| 119095 | C | T | ndhA      |
| 119109 | T | G | ndhA      |

|        |   |   |      |
|--------|---|---|------|
| 119250 | T | C | ndhA |
| 119307 | C | T | ndhA |
| 119341 | G | A | ndhA |
| 119362 | G | T | ndhA |
| 119415 | A | G | ndhA |
| 119457 | T | C | ndhA |
| 119498 | C | A | ndhA |
| 119588 | C | T | ndhA |
| 119596 | T | G | ndhA |
| 119615 | C | A | ndhA |
| 119623 | C | T | ndhA |
| 119697 | A | C | ndhA |
| 119723 | G | A | ndhA |
| 119727 | C | G | ndhA |
| 119728 | A | C | ndhA |
| 119739 | T | C | ndhA |
| 119747 | C | T | ndhA |
| 119771 | T | G | ndhA |
| 119779 | C | A | ndhA |
| 119880 | G | A | ndhA |
| 120003 | A | G | ndhA |
| 120065 | G | T | ndhA |
| 120189 | T | A | ndhA |
| 120222 | A | G | ndhA |
| 120469 | C | T | ndhH |
| 120489 | G | T | ndhH |
| 120610 | G | A | ndhH |
| 120648 | C | T | ndhH |
| 120650 | C | T | ndhH |
| 120718 | G | T | ndhH |
| 120802 | G | A | ndhH |
| 120813 | T | C | ndhH |
| 120853 | G | T | ndhH |
| 120893 | T | C | ndhH |
| 120980 | G | A | ndhH |
| 121021 | A | G | ndhH |
| 121026 | T | C | ndhH |
| 121147 | A | G | ndhH |
| 121156 | C | T | ndhH |
| 121171 | T | C | ndhH |
| 121183 | T | C | ndhH |
| 121306 | T | G | ndhH |
| 121336 | T | C | ndhH |
| 121369 | A | G | ndhH |



|        |   |   |            |
|--------|---|---|------------|
| 121425 | C | T | ndhH       |
| 121509 | C | T | ndhH       |
| 121530 | G | A | ndhH       |
| 121531 | T | C | ndhH       |
| 121541 | G | A | ndhH-rps15 |
| 121561 | T | C | ndhH-rps15 |
| 121580 | A | C | ndhH-rps15 |
| 121597 | A | C | ndhH-rps15 |
| 121607 | G | T | ndhH-rps15 |
| 121607 | G | A | ndhH-rps15 |
| 121608 | A | C | ndhH-rps15 |
| 121733 | C | A | rps15      |
| 121879 | A | C | rps15      |
| 121896 | T | G | rps15-ycf1 |
| 121929 | G | A | rps15-ycf1 |
| 121951 | T | G | rps15-ycf1 |
| 121987 | A | T | rps15-ycf1 |
| 122000 | G | T | rps15-ycf1 |
| 122001 | A | C | rps15-ycf1 |
| 122053 | T | G | rps15-ycf1 |
| 122083 | C | A | rps15-ycf1 |
| 122088 | T | G | rps15-ycf1 |
| 122189 | A | C | rps15-ycf1 |
| 122194 | G | A | rps15-ycf1 |
| 122259 | C | A | rps15-ycf1 |
| 122394 | T | G | ycf1       |
| 122403 | T | G | ycf1       |
| 122449 | G | T | ycf1       |
| 122457 | G | T | ycf1       |
| 122482 | C | A | ycf1       |
| 122494 | A | G | ycf1       |
| 122527 | C | A | ycf1       |
| 122538 | T | C | ycf1       |
| 122574 | A | G | ycf1       |
| 122590 | T | C | ycf1       |
| 122607 | C | A | ycf1       |
| 122609 | G | A | ycf1       |
| 122620 | G | A | ycf1       |
| 122703 | A | C | ycf1       |
| 122737 | G | A | ycf1       |
| 122778 | C | T | ycf1       |
| 122884 | C | A | ycf1       |
| 122900 | G | A | ycf1       |
| 123104 | G | T | ycf1       |

|        |   |   |      |
|--------|---|---|------|
| 123155 | T | C | ycf1 |
| 123156 | A | C | ycf1 |
| 123276 | G | A | ycf1 |
| 123282 | C | T | ycf1 |
| 123303 | C | T | ycf1 |
| 123305 | G | A | ycf1 |
| 123392 | T | G | ycf1 |
| 123408 | C | A | ycf1 |
| 123428 | G | A | ycf1 |
| 123532 | A | G | ycf1 |
| 123564 | A | C | ycf1 |
| 123573 | C | T | ycf1 |
| 123606 | A | G | ycf1 |
| 123623 | T | G | ycf1 |
| 123628 | G | A | ycf1 |
| 123664 | G | A | ycf1 |
| 123670 | C | T | ycf1 |
| 123685 | A | C | ycf1 |
| 123719 | G | A | ycf1 |
| 123761 | C | G | ycf1 |
| 123769 | T | C | ycf1 |
| 123786 | T | G | ycf1 |
| 123828 | A | C | ycf1 |
| 123877 | T | G | ycf1 |
| 123917 | C | T | ycf1 |
| 123925 | T | G | ycf1 |
| 123926 | T | G | ycf1 |
| 123929 | T | C | ycf1 |
| 123959 | T | G | ycf1 |
| 123969 | T | C | ycf1 |
| 124034 | C | T | ycf1 |
| 124112 | A | C | ycf1 |
| 124131 | C | A | ycf1 |
| 124192 | G | T | ycf1 |
| 124230 | A | G | ycf1 |
| 124248 | A | C | ycf1 |
| 124355 | T | G | ycf1 |
| 124370 | G | A | ycf1 |
| 124374 | A | C | ycf1 |
| 124389 | T | G | ycf1 |
| 124423 | A | G | ycf1 |
| 124442 | G | A | ycf1 |
| 124478 | G | T | ycf1 |
| 124500 | G | A | ycf1 |

|        |   |   |      |
|--------|---|---|------|
| 124511 | C | T | ycf1 |
| 124539 | A | G | ycf1 |
| 124602 | G | C | ycf1 |
| 124630 | T | C | ycf1 |
| 124721 | T | C | ycf1 |
| 124727 | A | C | ycf1 |
| 124869 | T | G | ycf1 |
| 124899 | G | A | ycf1 |
| 124915 | G | A | ycf1 |
| 124934 | A | G | ycf1 |
| 124938 | T | G | ycf1 |
| 124952 | C | T | ycf1 |
| 124977 | G | A | ycf1 |
| 124989 | T | A | ycf1 |
| 124997 | C | A | ycf1 |
| 125060 | C | T | ycf1 |
| 125073 | T | C | ycf1 |
| 125196 | G | A | ycf1 |
| 125205 | C | T | ycf1 |
| 125214 | G | A | ycf1 |
| 125261 | T | C | ycf1 |
| 125355 | T | C | ycf1 |
| 125487 | C | T | ycf1 |
| 125496 | G | A | ycf1 |
| 125554 | T | A | ycf1 |
| 125567 | C | T | ycf1 |
| 125624 | A | G | ycf1 |
| 125627 | G | T | ycf1 |
| 125629 | A | C | ycf1 |
| 125634 | G | T | ycf1 |
| 125822 | C | A | ycf1 |
| 125825 | G | T | ycf1 |
| 125841 | A | G | ycf1 |
| 125951 | A | G | ycf1 |
| 125954 | A | G | ycf1 |
| 125978 | T | C | ycf1 |
| 126000 | A | C | ycf1 |
| 126050 | T | G | ycf1 |
| 126078 | A | C | ycf1 |
| 126082 | C | T | ycf1 |
| 126105 | A | G | ycf1 |
| 126115 | A | C | ycf1 |
| 126143 | C | T | ycf1 |
| 126174 | C | T | ycf1 |

|        |   |   |      |
|--------|---|---|------|
| 126175 | A | C | ycf1 |
| 126209 | C | T | ycf1 |
| 126210 | T | C | ycf1 |
| 126222 | A | C | ycf1 |
| 126253 | A | G | ycf1 |
| 126260 | G | A | ycf1 |
| 126329 | T | G | ycf1 |
| 126337 | C | A | ycf1 |
| 126339 | A | G | ycf1 |
| 126351 | A | G | ycf1 |
| 126397 | C | T | ycf1 |
| 126413 | T | G | ycf1 |
| 126458 | T | C | ycf1 |
| 126476 | A | C | ycf1 |
| 126480 | T | C | ycf1 |
| 126601 | G | A | ycf1 |
| 126767 | A | G | ycf1 |
| 126786 | T | G | ycf1 |
| 126798 | A | C | ycf1 |
| 126846 | G | T | ycf1 |
| 126887 | T | C | ycf1 |
| 127008 | G | A | ycf1 |
| 127095 | T | A | ycf1 |
| 127116 | C | A | ycf1 |
| 127186 | A | C | ycf1 |
| 127482 | A | C | ycf1 |

InDels identified in *P. obconica* subsp. *obconica* chloroplast genomes

| InDels position | Ref                | Alt               |
|-----------------|--------------------|-------------------|
| 183             | ATATTATATTAT       | A                 |
| 267             | A                  | AAAGGAC           |
| 1614            | A                  | ATAAATAGAAAT      |
| 1732            | TA                 | T                 |
| 2749            | A                  | AAAG              |
| 3765            | TTATAGGA           | T                 |
| 3836            | GA                 | G,GAA             |
| 4039            | TC                 | T                 |
| 4489            | GTAAATAA           | G                 |
| 4579            | GA                 | G                 |
| 4681            | AAAATAT            | A                 |
|                 |                    | CAAATTGAAGAAATTGT |
| 4828            | C                  | CAGAATTTTCTAGGATC |
|                 |                    | AAT               |
| 4848            | TTACTGTTATAGAACATA | T                 |

|       |                   |                      |
|-------|-------------------|----------------------|
|       | GGGGAGTAATGAATTGG |                      |
|       | TATGAATAGAGCAAAAG |                      |
|       | AGAAAATAAAAAGTTAG |                      |
|       | GGGAG             |                      |
| 4957  | T                 | TATTACTCTAATTACTCTA  |
|       |                   | TA                   |
| 4959  | T                 | TA                   |
| 4962  | C                 | CTCTATTATTCTATTATTTT |
|       |                   | TACTCTATTAT          |
| 4969  | AT                | A                    |
| 5352  | ATGGTTAAATAAATGAG | A                    |
|       | ATTT              |                      |
| 5393  | TACTTAAAAAA       | T                    |
| 5397  | T                 | TA                   |
| 5749  | A                 | ATTTT,ATT,AT,ATTTT   |
| 6250  | T                 | TATTATA              |
| 6667  | T                 | TAAAGGAA             |
| 6911  | TA                | T                    |
| 6942  | T                 | TCAATATTAGACC        |
| 7983  | C                 | CA                   |
| 7992  | AAGG              | A                    |
| 7993  | AGG               | A                    |
| 7995  | G                 | GTT,GATT             |
| 8282  | GA                | GAA,GAAAA,G          |
| 8625  | CT                | C,CTT                |
| 8679  | G                 | GATAT                |
| 9778  | TATTAC            | T                    |
| 9786  | A                 | AT                   |
| 9793  | TA                | T                    |
| 9798  | A                 | AGTAAT               |
| 9949  | CT                | C                    |
| 10078 | A                 | AT                   |
| 11724 | G                 | GA                   |
| 12455 | T                 | TATATATAA            |
| 12461 | T                 | TAACAATAATAG         |
| 12474 | C                 | CAATATATAA           |
| 12475 | C                 | CA                   |
| 12586 | T                 | TCG                  |
| 12588 | GAA               | GAAA,GA,G            |
| 13095 | T                 | TTA                  |
|       |                   | CTAAATTCTTAAT,CTAAA  |
| 13113 | C                 | TTATTAAT,CTAAATTCTTA |
|       |                   | ATTAAATTCTTAAT       |
| 13278 | G                 | GGGT                 |

|       |                     |                                         |
|-------|---------------------|-----------------------------------------|
| 14203 | A                   | AAC                                     |
| 14207 | TCC                 | T                                       |
|       | TTTATCATTATTCCATATG |                                         |
| 14215 | AATAAAATGGAGATTAG   | T                                       |
|       | GCCGAATCA           |                                         |
|       | AAATTATTATTTCTTACAT |                                         |
| 14301 | TTTTCTTTTGGTCAATCGT | A                                       |
|       | TGGTTTTATTAAATTGAA  |                                         |
|       | GGGGGAGTCGTTCT      |                                         |
| 14381 | CTT                 | C,CT                                    |
| 15299 | CAATTCTATA          | C                                       |
| 16266 | A                   | ATACATTATAGT,ATACAT<br>ATAGT            |
| 22521 | T                   | TAATACTTAA,TAATACTT<br>AAAATACTTAA      |
| 22830 | C                   | CCCTTT,CTTT,CCTTT                       |
| 26670 | T                   | TTTA                                    |
| 27301 | A                   | AC                                      |
|       | TATTCATTAGTTATGTATA |                                         |
| 27464 | AATTTCTATTTTTTATGTC | T                                       |
|       | ATTAGGAAACCACAAA    |                                         |
| 27622 | C                   | CT                                      |
|       | TATTCATTAGTTATGTATA |                                         |
| 27671 | T                   | AATTTCTATTTTTTATGTC<br>ATTAGGAAACCACAAA |
| 27709 | T                   | TA                                      |
| 27948 | GT                  | G                                       |
| 28066 | C                   | CAATATTCTATTG                           |
| 28216 | C                   | CATATTCATAGAA                           |
| 28751 | AAACT               | A                                       |
| 28869 | T                   | TAATAA                                  |
| 29006 | T                   | TATA                                    |
| 29010 | T                   | TTATTAGA                                |
| 29029 | CTT                 | C                                       |
| 29034 | C                   | CAG                                     |
| 29062 | CT                  | C                                       |
| 29369 | ATTTTT              | A                                       |
| 29374 | T                   | TA                                      |
| 29380 | ATTTT               | A                                       |
| 29852 | T                   | TATAGTA                                 |
|       | AATGCATTCCTTCTCAAA  |                                         |
| 29937 | TAAAGGCGCGATTGTGG   | A                                       |
|       | GACGATCTTTATCTTTCTT |                                         |
|       | TTATCCTC            |                                         |

|       |                     |                     |
|-------|---------------------|---------------------|
| 30429 | G                   | GA,GAAA,GAA         |
| 31008 | ATT                 | AT,A                |
| 31016 | T                   | TATCTAA             |
| 31018 | T                   | TC                  |
| 31077 | T                   | TTCTATA             |
| 31084 | TAATATATAA          | T                   |
| 31109 | CTCATTTCCTAATTCTCT  | C                   |
|       | CTTAATTTATATTAAATAA |                     |
|       | AAATAATAAATTAGAGTA  |                     |
| 31124 | CGAAAAATACAATTTTCG  | C                   |
|       | CCCGGAATCTAATAATTT  |                     |
|       | GTCGAAAAAGAGGGAGT   |                     |
|       | TTAATTCCA           |                     |
|       | ATATTAAATAAAAAATAAT |                     |
| 31132 | AAATTAGAGTAC        | A                   |
| 31146 | T                   | TAAGA               |
| 31149 | T                   | TAAATTAGAA,TTAGAA   |
| 31154 | T                   | TAGAAAAATG          |
| 31161 | CG                  | C                   |
| 31164 | AAAATACAAT          | A                   |
| 31176 | CGCCCGGAA           | C                   |
|       | CTAATAATTTGTCGAAAA  |                     |
| 31186 | AGAGGGAGTTTAATTCC   | C                   |
|       | A                   |                     |
| 31260 | T                   | TGCCTAGCG           |
| 31330 | GAA                 | G                   |
| 31331 | AAATT               | A                   |
| 31333 | ATTT                | A,AT                |
| 31758 | T                   | TCATTATAATGA        |
| 31762 | T                   | TCTA                |
|       |                     | TGACATTAG,TAATGACAT |
| 31764 | T                   | TAG                 |
| 32011 | CTTT                | CTTTT,CTT,CT,C      |
| 32126 | TATTCC              | T                   |
|       | ACCAAGATTCATTTTAT   |                     |
| 32183 | TT                  | A                   |
| 32224 | A                   | ATATT               |
| 32474 | C                   | CT,CTT              |
| 32634 | AATAGGTT            | A                   |
| 35408 | C                   | CTTT,CTTTTT,CT,CTT  |
| 35593 | T                   | TA                  |
| 35815 | GA                  | G                   |
| 36255 | TTTAATA             | T                   |
| 36383 | CATATATAT           | C,CATAT             |

|       |                    |                      |
|-------|--------------------|----------------------|
| 36400 | CATAT              | C                    |
| 36584 | AAAACAAAAAAG       | A                    |
| 37278 | TATACG             | T                    |
| 41850 | ATTTTT             | A,ATTTTT             |
| 41865 | TATATAAATTATTC     | T                    |
| 41872 | A                  | ATTATTTCTCTT,ATGATTT |
| 41879 | C                  | CTCTT                |
| 42088 | G                  | CTCTTTTATTTT         |
| 42134 | TAGAACATATATTAAG   | GCC                  |
| 42239 | T                  | T                    |
| 42308 | AGACAAATAT         | TATCAATAG            |
| 42351 | T                  | A                    |
| 42353 | A                  | TTATAA,TTATAATATAA,T |
| 42625 | CTTTTT             | TC                   |
| 43225 | TC                 | AATATTAT             |
| 43228 | CGTTT              | C                    |
| 43743 | A                  | T                    |
| 44124 | A                  | C                    |
| 44191 | CA                 | AT,AT,ATTT           |
| 44523 | TAGATTTCA          | C                    |
| 44533 | GATTTAC            | T                    |
| 44641 | GAAAAA             | G                    |
| 44695 | TC                 | GA,GAAA,G,GAA        |
| 44871 | AT                 | T                    |
| 44928 | T                  | A                    |
| 45313 | ACTTTGATATTTGAACAG | TTAA                 |
| 46321 | TTAGATCTTT         | A                    |
| 46348 | CGATTATTATA        | C                    |
| 46418 | A                  | AT                   |
| 46427 | G                  | GA                   |
| 46428 | AAGGG              | A                    |
| 46432 | AGGGG              | AGGG,AG,AAGGGGGG,A   |
| 46452 | G                  | GAA                  |
| 46916 | C                  | CTT,CTTT,CT          |
| 46926 | A                  | AGAAT                |
| 46928 | CAT                | C                    |
| 47206 | T                  | TTC                  |
| 47208 | A                  | AAGT,AT              |
| 47210 | T                  | TTATTACTA            |
| 47330 | A                  | ATTACTATATC          |
|       |                    | TACTATATTACTATATCTA  |
|       |                    | AAAAAG               |



|       |                     |                    |
|-------|---------------------|--------------------|
|       | GGGGAACGACATCACAA   |                    |
| 47333 | TGAGATCCTAATCTCAAA  | G                  |
|       | TCAAAA              |                    |
| 47540 | TC                  | T                  |
| 47541 | CAA                 | CA,C               |
| 47551 | A                   | AGG,AAG            |
| 48026 | AT                  | A                  |
| 48120 | T                   | TA                 |
| 48133 | G                   | GTTTT              |
| 48299 | TGTTTTTTAA          | T                  |
| 48317 | G                   | GACCCA             |
|       | TTTTTATCCATCTAAGTGC |                    |
|       | TTAGAGATCTACCCCATC  | T                  |
| 48516 | TCTAAAATCGATGGGTAA  |                    |
|       | ATTATATTC           |                    |
| 48677 | GGTTT               | G                  |
| 48684 | T                   | TAACA              |
| 48744 | T                   | TA                 |
| 48767 | ACC                 | ACCC,AC,A          |
| 48925 | G                   | GA                 |
| 48971 | TC                  | T                  |
| 48972 | CTT                 | C,CT,CTTTTTT       |
| 48982 | TG                  | T                  |
| 49589 | TTTGGAA             | T                  |
| 49591 | TG                  | T                  |
| 49594 | AATTGG              | A                  |
| 49663 | A                   | AT                 |
| 49681 | TCAC                | T                  |
| 49685 | TTTC                | T                  |
| 51150 | T                   | TGAATAAA           |
| 51429 | T                   | TA                 |
| 51742 | G                   | GT                 |
| 51793 | T                   | TC                 |
| 51860 | T                   | TCTA               |
| 51862 | T                   | TTTG               |
| 51870 | T                   | TTTTATAGGGTTTA     |
| 52017 | A                   | ATATAAAT           |
|       |                     | CAATAAGAAATCGGGGT  |
|       |                     | TTAGTTTAGTACTCCATT |
|       |                     | TGTTGGTACCATTACCC  |
| 54985 | C                   | GAATCCAATTCAATTTAT |
|       |                     | TACTTAATTTAATAAGAT |
|       |                     | AAGTTAATTTTCAAATGA |
|       |                     | AACCAAACCCTTTTCAA  |

|       |                    |                    |
|-------|--------------------|--------------------|
|       |                    | AATATCAAGTGAATT,CA |
|       |                    | ATAAGAAATCGGGGTTT  |
|       |                    | AGTACTCCATTTT      |
| 55145 | CT                 | CTT,C              |
| 55226 | C                  | CA                 |
| 55266 | A                  | AG                 |
| 55267 | A                  | AGG,AGGG,AG        |
| 55350 | C                  | CCAT               |
| 55391 | A                  | AATATTAAT          |
| 55400 | A                  | AT                 |
|       | CAAGATTTAAAATTCAAT |                    |
| 57102 | AAAAT              | C                  |
| 57404 | CT                 | C                  |
| 57489 | TAAA               | TA,TAA,T           |
| 57501 | T                  | TG                 |
| 57609 | G                  | GGAGTTA            |
| 57743 | C                  | CTTACAGT           |
| 57746 | A                  | ACAGTAAT           |
| 58715 | CTTTATA            | C                  |
| 58722 | T                  | TTTATACAATTATC     |
| 58933 | CAGA               | C                  |
| 58934 | AGAAG              | A                  |
| 58937 | A                  | AGG                |
| 59514 | T                  | TA                 |
| 59627 | A                  | ATTATTACAAGATATCT  |
| 59846 | C                  | CTTTTT,CTTTTTT,CT  |
| 59955 | T                  | TA                 |
| 61064 | A                  | ATT                |
| 61459 | TACAAAA            | T                  |
| 61994 | TA                 | T                  |
| 63179 | TAC                | T                  |
| 63180 | AC                 | A                  |
| 63181 | C                  | CA                 |
| 63308 | TC                 | T                  |
| 63310 | CA                 | C                  |
| 63320 | AT                 | A                  |
| 63381 | GT                 | G                  |
| 63519 | T                  | TA                 |
| 63540 | GGTGTTGCA          | G                  |
| 63552 | T                  | TTTCAACAC          |
| 63615 | AT                 | ATTT,A,ATT         |
| 63717 | AATG               | A                  |
| 63979 | G                  | GA                 |
| 65171 | GGTGCCAC           | G                  |

|       |                   |                     |
|-------|-------------------|---------------------|
| 65380 | TGAAAAAAATAGA     | T                   |
| 65388 | AT                | A                   |
| 65390 | AGAGAAAAAAAT      | A                   |
| 65398 | A                 | AAATAGAACTAAAG      |
| 65519 | C                 | CTATGGAA            |
| 65537 | GA                | GAAA,G,GAA          |
| 66623 | TA                | T                   |
| 66641 | ATATATATAAT       | A                   |
| 66647 | ATAATTATATATAATAT | A                   |
| 66649 | AAT               | A                   |
| 66655 | ATATAATAT         | A                   |
| 67027 | TC                | T                   |
| 67409 | T                 | TTTCTCTTCCTCCC      |
| 67653 | GTATTACT          | G                   |
| 68074 | T                 | TATATATAATAAAATAGTT |
|       |                   | A                   |
|       |                   | AAATATTTAATAAATACA  |
| 68085 | A                 | TTT                 |
| 68477 | TAGAACTAGA        | T                   |
| 68671 | TA                | T                   |
| 68681 | AATATAATAATC      | A                   |
| 69290 | AT                | A                   |
| 69634 | CTT               | CT,C                |
| 69684 | CT                | CTTT,C              |
| 69846 | G                 | GAAA,GA,GAAAA       |
| 70080 | T                 | TAAAAAAATTA         |
| 70473 | T                 | TA                  |
| 70668 | ATATTTCT          | A                   |
| 70744 | TA                | T                   |
| 70813 | T                 | TGA                 |
| 70910 | TTTTTG            | T                   |
| 70915 | G                 | GAAAAA              |
| 71873 | C                 | CATTTAT             |
| 71917 | T                 | TG                  |
| 71981 | T                 | TA                  |
| 72007 | CA                | C                   |
| 72014 | A                 | AG                  |
| 72016 | GA                | G                   |
| 72262 | AT                | A                   |
| 74265 | A                 | AT                  |
| 74372 | TAAAAAAG          | T                   |
| 75381 | CA                | C                   |
| 75391 | AAT               | A                   |
| 75392 | AT                | A                   |

|       |                     |                     |
|-------|---------------------|---------------------|
| 75640 | CAATAATA            | C                   |
| 75688 | AT                  | A                   |
| 75809 | AT                  | ATT,A               |
|       | AAATAGAGAAACCCTAA   | A,AAATAATAGAGAAACC  |
| 77025 | TTAGGGTTTCTCTATTTCA | CTAATTAGGGTTTCTCTAT |
|       | CTTAATTTAAGATTG     | TTCACCTTAATTTAAGATT |
|       |                     | G                   |
| 77053 | C                   | CTAT                |
| 77286 | CATGAT              | C                   |
| 77359 | C                   | CAATAAAATAAATA      |
| 77377 | T                   | TA                  |
| 77379 | C                   | CTCTGGAAAA          |
| 77380 | T                   | TCTGGAAAAG          |
| 77413 | A                   | ATTTAATTTATAT       |
| 77460 | T                   | TGTAG               |
| 78101 | ATATTACGAC          | A                   |
| 78164 | T                   | TA                  |
| 78165 | AATCAATTAAATT       | A                   |
| 78491 | A                   | ATTTTTT             |
| 79341 | A                   | AT                  |
| 79840 | T                   | TC                  |
| 79841 | C                   | CT                  |
| 79992 | T                   | TATTTTTA            |
| 80313 | AT                  | A                   |
| 80345 | T                   | TA                  |
| 80399 | GT                  | G,GTT               |
| 80931 | TGA                 | T,TA                |
| 81487 | C                   | CA                  |
| 82022 | G                   | GAA,GA              |
|       | CATTTGAATTGATATAATT |                     |
|       | GATATATATATATATTTAA |                     |
|       | TGAATAATAGATGAAATC  |                     |
|       | GCGGTATTCTTTGACATT  |                     |
| 82047 | GAATCTAAATCCTATTAG  | C                   |
|       | TGTTTTGTATACCCTGTTT |                     |
|       | GGGTATTTTGGATATATA  |                     |
|       | ATTAAACCTATTAAACAT  |                     |
|       | AGATTTCTATTTA       |                     |
| 82052 | GAATTGATAT          | G                   |
| 82057 | GATATAATTGAT        | G                   |
| 82563 | T                   | TA                  |
| 82747 | ATTTTTTT            | ATTTTT,ATTTTTT,A    |
| 82749 | T                   | TC                  |
| 82904 | GT                  | G,GTT               |

|        |                                                                                                     |                            |
|--------|-----------------------------------------------------------------------------------------------------|----------------------------|
| 83840  | AATTCATCTTCAT                                                                                       | A                          |
| 111415 | T                                                                                                   | TTCTTACTTATTTTTTTAT<br>GTG |
| 111598 | GAA                                                                                                 | G                          |
| 111602 | TAAAACAC                                                                                            | T                          |
| 111610 | TAAA                                                                                                | TA,TAA,T                   |
| 111653 | TA                                                                                                  | T                          |
| 111656 | GTTAGCCTAATGAAATAA<br>TAACTCCTCTTTTCTTTA<br>TTATTTCAATTTATTCAAAA<br>TAATTAAGTAGTTCATTTT<br>GAAATTGA | G                          |
| 111766 | CG                                                                                                  | C                          |
| 111817 | G                                                                                                   | GAAACTA                    |
| 111825 | A                                                                                                   | AAC                        |
| 111826 | T                                                                                                   | TAAAC                      |
| 111910 | T                                                                                                   | TA                         |
| 111911 | ATT                                                                                                 | A,AT                       |
| 111917 | T                                                                                                   | TA                         |
| 111925 | G                                                                                                   | GTTT,GTT,GTTTT,GT          |
| 112377 | T                                                                                                   | TA                         |
| 112520 | GAAACCTTCAAATTACTA<br>TTCATTTGAATTCATCAA<br>TTTTATTCTTTCTTAAAAC<br>TTAAAAA                          | G                          |
| 112574 | CT                                                                                                  | C                          |
| 112576 | TA                                                                                                  | T                          |
| 112747 | TA                                                                                                  | T,TAA                      |
| 112761 | AAATAG                                                                                              | A                          |
| 113382 | C                                                                                                   | CACCA                      |
| 113388 | A                                                                                                   | AAAAGAT                    |
| 113392 | TTTTCCTTTGG                                                                                         | T                          |
| 113845 | T                                                                                                   | TATAAAAA                   |
| 113847 | TA                                                                                                  | T                          |
| 113988 | T                                                                                                   | TGTACAGC,TGTACGGC          |
| 113990 | T                                                                                                   | TACAGCGTACAGCGA            |
| 117464 | CTAAT                                                                                               | C                          |
| 117469 | CAATCA                                                                                              | C                          |
| 118809 | G                                                                                                   | GATATT                     |
| 118823 | TTAATA                                                                                              | T                          |
| 119715 | TAAAAATGGATTCAATTC<br>ATTCATTTTTTTACTAGA<br>AACG                                                    | T                          |
| 120332 | CTGTTGT                                                                                             | C                          |

|        |                                 |           |
|--------|---------------------------------|-----------|
| 121542 | GT                              | G         |
| 121611 | TTTTTC                          | T         |
| 121616 | A                               | AAAAG     |
| 122115 | GAAATAATGGATATCCCA<br>TTACATTAA | G         |
| 122127 | AT                              | A         |
| 122129 | CCCATTACATTAAAAATA<br>ATGGATAT  | C         |
| 125519 | C                               | CTTTTTTT  |
| 125526 | T                               | TCTTTTCTC |
| 126551 | TTATTAA                         | T         |
| 126804 | AAGTATTT                        | A         |
| 126815 | A                               | AT        |

---
