# Supplementary material for: The Complete Chloroplast Genomes of Primula obconica Provide Insight That Neither Species nor Natural Section Represent Monophyletic Taxa in Primula (Primulaceae)
Source: MDPI journal article supplement (doi:10.3390/genes13040567), 2022-03-23
Supplement: s1 [file s1]

**Table S7.** List the SSRs that shared by *P. obconica* subsp. *obconica*.

| Repeat motif          |                               |                       |                       |                               |                               |                              |                              |                       | Location   |
|-----------------------|-------------------------------|-----------------------|-----------------------|-------------------------------|-------------------------------|------------------------------|------------------------------|-----------------------|------------|
| YN1                   | HBD                           | HNL                   | HND                   | HBE                           | ZP2                           | ZP1                          | SCD                          | SCB                   |            |
| (T)10\ (A)10          | (A)10\ (T)12                  | (T)10                 | (T)10                 | (T)10                         | (T)13                         | (T)10                        | (A)10                        | (A)10                 | rps16      |
| (T)11                 | (T)11                         | (T)11                 | (T)11                 | (T)11                         | (T)11                         | (T)11                        | (T)10\ (T)11                 | (T)11                 | rpoC2      |
| (T)10                 | (T)11                         | (T)11                 | (T)11                 | (T)11                         | (T)11                         | (T)11                        | (T)10                        | (T)10                 | rpoB       |
| (AATA)3               | (AATA)3                       | (AATA)3               | (AATA)3               | (T)10\ (AATA)3                | (AATA)3                       | (T)10\ (TATAA)3\ (AATA)3     | (AATA)3                      | (AATA)3               | psaA-ycf3  |
| (A)10                 | (A)10\ (T)10                  | (A)11\ (T)10          | (A)11\ (T)10          | (A)10\ (T)10                  | (A)11,<br>(G)10\ (T)10        | (A)11\ (T)11                 | (A)12                        | (A)11                 | rps4-trnT  |
| (T)10                 | (T)10                         | (T)10                 | (T)10                 | (T)10                         | (T)10                         | (T)10                        | (T)10                        | (T)10                 | atpB       |
| (A)10\ (A)10          | (A)10\ (T)12                  | (A)10\ (T)12          | (A)10\ (T)12          | (A)10\ (A)11\ (T)12           | (A)10\ (T)11                  | A)11\ (A)10\ (T)12           | (A)10\ (T)10                 | (A)10                 | petA-psbJ  |
| (TA)7                 | (TA)7                         | (TA)7                 | (TA)7                 | (TA)7                         | (TA)7                         | (TA)7                        | (TA)9                        | (TA)6                 | trnW-trnP  |
| (A)10                 | (A)10                         | (A)12                 | (A)12                 | (A)11                         | (A)11\ (T)10                  | (A)10                        | (A)11                        | (A)11                 | petB       |
| (AT)7\ (TTTC)3        | (A)11\ (AT)7                  | (A)10\ (AT)7\ (T)10   | (A)10\ (AT)7\ (T)10   | (AT)6                         | (T)16                         | (A)10\ (AT)7                 | (A)10\ (AT)7\ (TTTC)3\ (T)10 | (A)11\ (TTTC)3        | rpl16      |
| (A)13                 | (A)13                         | (A)13                 | (A)13                 | (A)13                         | (A)13                         | (A)13                        | (A)13                        | (A)13                 | trnN-ndhF  |
| (A)11                 | (A)11                         | (A)11\ (A)11          | (A)11\ (A)11          | (A)12\ (A)11                  | (A)12\ (A)10                  | (T)10\ (A)11\ (A)10\         | (A)11                        | (A)11                 | rpl32-trnL |
| (AATA)3               | (AATA)3                       | (AATA)3               | (AATA)3               | (AATA)3                       | (AATA)3\ (A)10                | (AATA)3                      | (AATA)3                      | (AATA)3               | ndhD       |
| (GAAA)3               | (GAAA)3                       | (GAAA)3               | (GAAA)3               | (GAAA)3                       | (GAAA)3                       | (GAAA)3                      | (GAAA)3                      | (GAAA)3               | ndhA       |
| (T)11 \ (T)11         | (T)11 \ (T)11                 | (T)11 \ (T)11         | (T)11 \ (T)11         | (T)11 \ (T)11                 | (T)11 \ (T)11                 | (T)11 \ (T)11                | (T)11 \ (T)11                | (T)11                 | ycf1       |
| \ (T)11\ (T)12\ (T)13 | \ (T)11 \ (T)11\ (T)12\ (T)13 | \ (T)11\ (T)12\ (T)13 | \ (T)11\ (T)12\ (T)13 | \ (T)11 \ (T)11\ (T)12\ (T)13 | \ (T)11 \ (T)11\ (T)12\ (T)13 | \ (T)11\ (T)10\ (T)12\ (T)13 | \ (T)11\ (T)12\ (T)13        | \ (T)11\ (T)12\ (T)13 |            |
