# Supplementary material for: The Complete Chloroplast Genomes of Primula obconica Provide Insight That Neither Species nor Natural Section Represent Monophyletic Taxa in Primula (Primulaceae)
Source: MDPI journal article supplement (doi:10.3390/genes13040567), 2022-03-23
Supplement: s1 [file s1]

**Table S3.** List of genes in the chloroplast genomes of *P. obconica* subsp. *obconica*

| Category                 | Group of gene                      | Gene name                                                                                         |
|--------------------------|------------------------------------|---------------------------------------------------------------------------------------------------|
| Genes for photosynthesis | Subunits of ATP synthase           | <i>atpA, atpB, atpE, atpF, atpH, atpI</i>                                                         |
|                          | Subunits of photosystem II         | <i>psbA, psbB, psbC, psbD, psbE, psbF, psbI, psbJ, psbK, psbL, psbM, psbN, psbT, psbZ, ycf3</i>   |
|                          | Subunits of NADH-dehydrogenase     | <i>ndhA, ndhB, ndhB, ndhC, ndhD, ndhE, ndhF, ndhG, ndhH, ndhI, ndhJ, ndhK</i>                     |
|                          | Subunits of cytochrome b/f complex | <i>petA, petB, petD, petG, petL, petN</i>                                                         |
|                          | Subunits of photosystem I          | <i>psaA, psaB, psaC, psaI, psaJ</i>                                                               |
|                          | Subunit of rubisco                 | <i>rbcL</i>                                                                                       |
|                          | Large subunit of ribosome          | <i>rpl14, rpl16, rpl2, rpl2, rpl20, rpl22, rpl23, rpl23, rpl32, rpl33, rpl36</i>                  |
| Self replication         | DNA dependent RNA polymerase       | <i>rpoA, rpoB, rpoC1, rpoC2</i>                                                                   |
|                          | Small subunit of ribosome          | <i>rps11, rps12, rps12, rps14, rps15, rps16, rps18, rps19, rps2, rps3, rps4, rps7, rps7, rps8</i> |
|                          | c-type cytochrom synthesis gene    | <i>ccsA</i>                                                                                       |
| Other genes              | Envelop membrane protein           | <i>cemA</i>                                                                                       |
|                          | Protease                           | <i>clpP</i>                                                                                       |
|                          | Maturase                           | <i>matK</i>                                                                                       |
| Unkown                   | Conserved open reading frames      | <i>ycf1, ycf2, ycf2, ycf4</i>                                                                     |
