# Supplementary material for: The Complete Chloroplast Genomes of Primula obconica Provide Insight That Neither Species nor Natural Section Represent Monophyletic Taxa in Primula (Primulaceae)
Source: Genes (Basel). 2022 Mar 23;13(4):567. doi: 10.3390/genes13040567 (PMC9030805; doi:10.3390/genes13040567)
Supplement: Supplementary file 1 [file genes-13-00567-s001.zip]

Archive with 9 entries (9 files):
- Supplemental Figure S1.jpg
- Supplemental Figure S2.jpg
- Supplemental Table S1.pdf
- Supplemental Table S2.pdf
- Supplemental Table S3.pdf
- Supplemental Table S4.pdf
- Supplemental Table S5.pdf
- Supplemental Table S6.pdf
- Supplemental Table S7.pdf
